# Supplementary material for: Cough symptom severity in patients with refractory or unexplained chronic cough: a systematic survey and conceptual framework
Source: PubMed Central journal article supplement — Eur Respir Rev. 2021 Jul 14;30(161):210104. doi: 10.1183/16000617.0104-2021 (PMC9518000; doi:10.1183/16000617.0104-2021), 2021-07-14
Supplement: ERR-0104-2021_Supplementary_tables.pdf [file ERR-0104-2021_Supplementary_tables.pdf]

## Supplementary Table 1: Search Strategy

### MEDLINE

Database: OVID Medline Epub Ahead of Print, In-Process & Other Non-Indexed Citations, Ovid MEDLINE(R) Daily and Ovid MEDLINE(R) 1946 to Present

Search Strategy:

- 
- 1 (measure or measurement).mp. [mp=title, abstract, original title, name of substance word, subject heading word, floating sub-heading word, keyword heading word, organism supplementary concept word, protocol supplementary concept word, rare disease supplementary concept word, unique identifier, synonyms] (1132643)
  - 2 "Quality of Life"/ (195719)
  - 3 (QALY or HRQOL or HRQL).mp. [mp=title, abstract, original title, name of substance word, subject heading word, floating sub-heading word, keyword heading word, organism supplementary concept word, protocol supplementary concept word, rare disease supplementary concept word, unique identifier, synonyms] (28959)
  - 4 patient reported outcome measures/ (6171)
  - 5 Patient reported outcome\*.mp. (21964)
  - 6 PROMS.mp. (2015)
  - 7 Self Report/ (32811)
  - 8 questionnaire\*.mp. or exp "Surveys and Questionnaires"/ (1288591)
  - 9 (scale or scales).mp. [mp=title, abstract, original title, name of substance word, subject heading word, floating sub-heading word, keyword heading word, organism supplementary concept word, protocol supplementary concept word, rare disease supplementary concept word, unique identifier, synonyms] (879118)
  - 10 measures.mp. (752006)
  - 11 assessment.mp. (1381428)
  - 12 index.mp. (1064192)
  - 13 (diary or diaries).mp. [mp=title, abstract, original title, name of substance word, subject heading word, floating sub-heading word, keyword heading word, organism supplementary concept word, protocol supplementary concept word, rare disease supplementary concept word, unique identifier, synonyms] (24177)
  - 14 or/1-13 (4809120)
  - 15 Cough/ (15928)
  - 16 (cough adj5 (chronic\* or persistent\* or refractory)).mp. (6331)
  - 17 15 or 16 (19484)
  - 18 14 and 17 (4874)
  - 19 COPD.mp. or exp Pulmonary Disease, Chronic Obstructive/ (73349)
  - 20 exp Asthma/ or asthma.mp. (176455)
  - 21 bronchiectasis.mp. or Bronchiectasis/ (12627)
  - 22 Gastroesophageal Reflux/ (25909)
  - 23 GERD.mp. (8747)
  - 24 Respiratory Tract Diseases/ (22194)
  - 25 or/19-24 (295030)
  - 26 25 and cough.ti. (1904)
  - 27 14 and 26 (575)

28 18 or 27 (4902)  
29 limit 28 to yr="2007 -Current" (3022)

EMBASE (OVID)

Database: Embase <1974 to 2020 August 20>  
Search Strategy:

- 
- 1 (measure or measurement).mp. [mp=title, abstract, heading word, drug trade name, original title, device manufacturer, drug manufacturer, device trade name, keyword, floating subheading word, candidate term word] (1585118)
  - 2 "quality of life"/ (473877)
  - 3 (QALY or HRQOL or HRQL).mp. [mp=title, abstract, heading word, drug trade name, original title, device manufacturer, drug manufacturer, device trade name, keyword, floating subheading word, candidate term word] (49704)
  - 4 patient-reported outcome/ (23682)
  - 5 Patient reported outcome\*.mp. (40876)
  - 6 PROMS.mp. (3172)
  - 7 self report/ (121253)
  - 8 questionnaire\*.mp. (967340)
  - 9 questionnaire/ (698105)
  - 10 (scale or scales).mp. [mp=title, abstract, heading word, drug trade name, original title, device manufacturer, drug manufacturer, device trade name, keyword, floating subheading word, candidate term word] (1266774)
  - 11 measures.mp. (917402)
  - 12 assessment.mp. (2729948)
  - 13 index.mp. (1225948)
  - 14 (diary or diaries).mp. [mp=title, abstract, heading word, drug trade name, original title, device manufacturer, drug manufacturer, device trade name, keyword, floating subheading word, candidate term word] (38577)
  - 15 or/1-14 (6762480)
  - 16 (cough adj5 (chronic\* or persistent\* or refractory)).mp. (11599)
  - 17 chronic cough/ (4133)
  - 18 16 or 17 (11599)
  - 19 15 and 18 (3898)
  - 20 COPD.mp. or chronic obstructive lung disease/ (153682)
  - 21 exp asthma/ or asthma.mp. (290806)
  - 22 bronchiectasis.mp. or bronchiectasis/ (21916)
  - 23 Gastroesophageal Reflux.mp. or gastroesophageal reflux/ (60147)
  - 24 GERD.mp. (18388)
  - 25 respiratory tract disease/ (57958)
  - 26 or/20-25 (532230)
  - 27 26 and cough.ti. (3389)
  - 28 15 and 27 (1299)
  - 29 19 or 28 (4341)
  - 30 limit 29 to yr="2007 -Current" (3384)

CINAHL (Ebsco)

| #   | Query Results                                                                  |           |
|-----|--------------------------------------------------------------------------------|-----------|
| S28 | S18 OR S27                                                                     | 1,963     |
| S27 | S14 AND S26                                                                    | 176       |
| S26 | S24 AND S25                                                                    | 555       |
| S25 | TI cough*                                                                      | 3,418     |
| S24 | S19 OR S20 OR S21 OR S22 OR S23                                                | 79,446    |
| S23 | (MH "Respiratory Tract Diseases")                                              | 4,219     |
| S22 | (MH "Gastroesophageal Reflux") OR "GERD"                                       | 7,802     |
| S21 | (MH "Bronchiectasis") OR "bronchiectasis"                                      | 1,971     |
| S20 | (MH "Asthma+") OR "asthma"                                                     | 44,584    |
| S19 | (MH "Pulmonary Disease, Chronic Obstructive") OR "COPD"                        | 25,710    |
| S18 | S14 AND S17                                                                    | 1,960     |
| S17 | S15 OR S16                                                                     | 6,586     |
| S16 | TX (cough N5 (chronic* or persistent* or refractory))                          | 1,753     |
| S15 | (MH "Cough")                                                                   | 5,737     |
| S14 | S1 OR S2 OR S3 OR S4 OR S5 OR S6 OR S7 OR S8 OR S9 OR S10 OR S11 OR S12 OR S13 | 1,814,773 |
| S13 | TX diary or diaries                                                            | 19,561    |
| S12 | "index"                                                                        | 276,816   |
| S11 | "assessment"                                                                   | 653,257   |
| S10 | "measures"                                                                     | 343,398   |
| S9  | TX scale or scales                                                             | 557,780   |
| S8  | (MH "Questionnaires") OR "questionnaire*"                                      | 501,631   |
| S7  | (MH "Self Report")                                                             | 69,370    |
| S6  | "PROMS"                                                                        | 1,000     |
| S5  | TX Patient reported outcome*                                                   | 11,096    |
| S4  | (MH "Patient-Reported Outcomes")                                               | 2,540     |
| S3  | TX QALY or HRQOL or HRQL                                                       | 13,599    |
| S2  | (MH "Quality of Life")                                                         | 111,854   |
| S1  | measure or measurement                                                         | 646,905   |

PsycInfo (OVID)

Database: APA PsycInfo <1806 to August Week 3 2020>

Search Strategy:

- 
- 1 (measure or measurement).mp. [mp=title, abstract, heading word, table of contents, key concepts, original title, tests & measures, mesh] (396852)
  - 2 exp "quality of life"/ (43380)
  - 3 (QALY or HRQOL or HRQL).mp. [mp=title, abstract, heading word, table of contents, key concepts, original title, tests & measures, mesh] (6651)
  - 4 patient reported outcome measures/ (312)
  - 5 Patient reported outcome\*.mp. (3027)
  - 6 PROMS.mp. (213)
  - 7 self-report/ (17610)
  - 8 exp Questionnaires/ or questionnaire\*.mp. (414670)

- 9 (scale or scales).mp. [mp=title, abstract, heading word, table of contents, key concepts, original title, tests & measures, mesh] (688234)
- 10 measures.mp. (385967)
- 11 exp Measurement/ (439807)
- 12 assessment.mp. (397089)
- 13 index.mp. (198172)
- 14 (diary or diaries).mp. [mp=title, abstract, heading word, table of contents, key concepts, original title, tests & measures, mesh] (13544)
- 15 or/1-14 (1676130)
- 16 (cough adj5 (chronic\* or persistent\* or refractory)).mp. (117)
- 17 COPD.mp. or exp Chronic Obstructive Pulmonary Disease/ (2129)
- 18 asthma.mp. or exp Asthma/ (8076)
- 19 bronchiectasis.mp. (33)
- 20 GERD.mp. (304)
- 21 Gastroesophageal Reflux.mp. (409)
- 22 exp Respiratory Tract Disorders/ (14824)
- 23 or/17-22 (18802)
- 24 23 and cough.ti. (69)
- 25 15 and 24 (30)
- 26 15 and 16 (48)
- 27 25 or 26 (73)

PubMed

Query

(measure or scale or index or or assessment or questionnaire) AND (((("publisher"[Filter] OR "inprocess"[Filter]) OR "pubmednotmedline"[Filter]) OR "pubstatusaheadofprint"[All Fields])) AND (cough[Title]))

Sort By

Publication Date

Search Details

((((((((((((((((((((((("measurability"[All Fields] OR "measurable"[All Fields]) OR "measurably"[All Fields]) OR "measure s"[All Fields]) OR "measureable"[All Fields]) OR "measured"[All Fields]) OR "measurement"[All Fields]) OR "measurement s"[All Fields]) OR "measurements"[All Fields]) OR "measurer"[All Fields]) OR "measurers"[All Fields]) OR "measuring"[All Fields]) OR "measureings"[All Fields]) OR "measurment"[All Fields]) OR "measurments"[All Fields]) OR "weights and measures"[MeSH Terms]) OR ("weights"[All Fields] AND "measures"[All Fields])) OR "weights and measures"[All Fields]) OR "measure"[All Fields]) OR "measures"[All Fields]) OR (((((((("scale s"[All Fields] OR "scaled"[All Fields]) OR "scaling"[All Fields]) OR "scalings"[All Fields]) OR "weights and measures"[MeSH Terms]) OR ("weights"[All Fields] AND "measures"[All Fields])) OR "weights and measures"[All Fields]) OR "scale"[All Fields]) OR "scales"[All Fields])) OR (((((((("abstracting and indexing"[MeSH Terms] OR ("abstracting"[All Fields] AND "indexing"[All Fields])) OR "abstracting and indexing"[All Fields]) OR "index"[All Fields]) OR "indexed"[All Fields]) OR "indexes"[All Fields]) OR "indexing"[All Fields]) OR

"indexation"[All Fields]) OR "indexations"[All Fields]) OR "indexe"[All Fields]) OR "indexer"[All Fields]) OR "indexers"[All Fields]) OR "indexs"[All Fields])) OR (((((((("assess"[All Fields] OR "assessed"[All Fields]) OR "assessment"[All Fields]) OR "assesses"[All Fields]) OR "assessing"[All Fields]) OR "assessment"[All Fields]) OR "assessment s"[All Fields]) OR "assessments"[All Fields])) OR (((((((("questionnaire"[All Fields] OR "questionnaire s"[All Fields]) OR "surveys and questionnaires"[MeSH Terms]) OR ("surveys"[All Fields] AND "questionnaires"[All Fields])) OR "surveys and questionnaires"[All Fields]) OR "questionnaire"[All Fields]) OR "questionnaires"[All Fields])) AND (((("publisher"[Filter] OR "inprocess"[Filter]) OR "pubmednotmedline"[Filter]) OR "pubstatusaheadofprint"[All Fields]) AND "cough"[Title])

Results

328

HaPI

Health and Psychosocial instruments database (OVID)

Search: cough

Results: 246

**Supplementary Table 2:** Studies excluded from qualitative synthesis at the full text review

| Title                                                                                                                                 | Authors                                                                                                                                          | Published Year | Notes                                                                                        |
|---------------------------------------------------------------------------------------------------------------------------------------|--------------------------------------------------------------------------------------------------------------------------------------------------|----------------|----------------------------------------------------------------------------------------------|
| Phenotypes and characteristics of chronic cough in a general population-the Austrian lead study                                       | Abozid, H.; Baxter, C.; Hartl, S.; Salomonsson, S.; Breyer-Kohansal, R.; Breyer, M. K.; Ofenheimer, A.; Braun, E.; Schrott, A.; Burghuber, O. C. | 2020           | Exclusion reason: Conference abstract;                                                       |
| Prevalence and characteristics of chronic cough in a general population study                                                         | Abozid, H.; Hartl, S.; Breyer-Kohansal, R.; Breyer, M. K.; Ofenheimer, A.; Schrott, A.; Burghuber, O. C.                                         | 2019           | Exclusion reason: Conference abstract;                                                       |
| Benign Vocal Fold Lesions in Patients with Chronic Cough                                                                              | Adessa, M.; Xiao, R.; Hull, D.; Bowen, A. J.; Milstein, C. F.; Benninger, M. S.; Bryson, P. C.                                                   | 2020           | Exclusion reason: Does not report statements that inform items or domains of cough severity; |
| Heterogeneity of perception of symptoms in patients with asthma                                                                       | Akihiko, Ohwada; Katsuhiko, Sato                                                                                                                 | 2019           | Exclusion reason: Chronic cough was undefined or not >8 weeks;                               |
| Clinical characteristics of early responder of chronic cough: Prospective, observational cohort study in Korea                        | An, T.; Rhee, C.; Lee, J.; Park, C.; Yoon, H.                                                                                                    | 2018           | Exclusion reason: Conference abstract;                                                       |
| Development and validation of a laryngopharyngeal reflux questionnaire, the Pharyngeal Reflux Symptom Questionnaire                   | Andersson, O.; Ryden, A.; Ruth, M.; Moller, R. Y.; Finizia, C.                                                                                   | 2010           | Exclusion reason: Wrong indication;                                                          |
| The relationship between cough-specific quality of life and abdominal muscle endurance, fatigue, and depression in patients with COPD | Arikan, H.; Savci, S.; Calik-Kutukcu, E.; Vardar-Yagli, N.; Saglam, M.; Inal-Ince, D.; Coplu, L.                                                 | 2015           | Exclusion reason: Chronic cough was undefined or not >8 weeks;                               |
| Prevalence and incidence of, and risk factors for chronic                                                                             | Arinze, J. T.; de Roos, E. W.; Karimi, L.; Verhamme, K. M. C.; Stricker, B. H.;                                                                  | 2020           | Exclusion reason: Does not report statements that inform items or domains of cough           |

|                                                                                                                     |                                                                                                                                                                                                                                                              |      |                                                                                              |
|---------------------------------------------------------------------------------------------------------------------|--------------------------------------------------------------------------------------------------------------------------------------------------------------------------------------------------------------------------------------------------------------|------|----------------------------------------------------------------------------------------------|
| cough in the adult population: the Rotterdam Study                                                                  | Brusselle, G. G.                                                                                                                                                                                                                                             |      | severity;                                                                                    |
| Prevalence and incidence of chronic cough in middle-aged and older subjects: The Rotterdam Study                    | Arinze, J. T.; Van De Roos, E. W.; Verhamme, K. M. C.; Stricker, B.; Brusselle, G. G.                                                                                                                                                                        | 2019 | Exclusion reason: Conference abstract;                                                       |
| Identification and definition of asthma-COPD overlap: The CanCOLD study                                             | Barrecheguren, M.; Pinto, L.; Mostafavi-Pour-Manshadi, S. M. Y.; Tan, W. C.; Li, P. Z.; Aaron, S. D.; Benedetti, A.; Chapman, K. R.; Walker, B.; Fitzgerald, J. M.; Hernandez, P.; Maltais, F.; Marciniuk, D. D.; O'Donnell, D. E.; Sin, D. D.; Bourbeau, J. | 2020 | Exclusion reason: Wrong indication;                                                          |
| Validity and reliability of the reflux symptom index (RSI)                                                          | Belafsky, P.C.; Postma, G.N.; Koufman, J.A.                                                                                                                                                                                                                  | 2002 | Exclusion reason: Wrong indication;                                                          |
| The challenge of diagnosing chronic cough: A retrospective observational study in the United Kingdom                | Birring, S. S.; Holden, S. E.; Jenkins-Jones, S.; Morice, A. H.; Weaver, J.; Langerman, H.; Currie, C.                                                                                                                                                       | 2019 | Exclusion reason: Conference abstract;                                                       |
| Cough frequency, cough sensitivity and health status in patients with chronic cough                                 | Birring, S.S.; Matos, S.; Patel R.B.; Prudon, B.; Evans, D.H.; Pavord, I.D.                                                                                                                                                                                  | 2006 | Exclusion reason: Does not report statements that inform items or domains of cough severity; |
| Relationship between health-related quality of life and objective cough frequency in a phase 2b trial of gefapixant | Birring, S. S.; Muccino, D.; Bacci, E.; Vernon, M.; Schelfhout, J.; Nguyen, A. M.                                                                                                                                                                            | 2019 | Exclusion reason: Conference abstract;                                                       |
| Burden of asthma, dyspnea, and chronic cough in South Asia                                                          | Bishwajit, G.; Tang, S.; Yaya, S.; Feng, Z.                                                                                                                                                                                                                  | 2017 | Exclusion reason: Does not report statements that inform items or domains of cough severity; |
| Typical reflux symptoms are associated with increased levels of reflux and a positive                               | Blondeau, K.; Lenglinger, J.; Hadrich, M.; Tack, J. F.; Tutuian, R.                                                                                                                                                                                          | 2012 | Exclusion reason: Conference abstract;                                                       |

|                                                                                                                |                                                                                                                                                                                       |      |                                                                                              |
|----------------------------------------------------------------------------------------------------------------|---------------------------------------------------------------------------------------------------------------------------------------------------------------------------------------|------|----------------------------------------------------------------------------------------------|
| symptom association in patients with cough                                                                     |                                                                                                                                                                                       |      |                                                                                              |
| [Urinary incontinence due to chronic cough in interstitial lung disease]                                       | Bradaia, F.; Lazor, R.; Khouatra, C.; Poissonnier, L.; Cottin, V.; Cordier, J. F.                                                                                                     | 2009 | Exclusion reason: Chronic cough was undefined or not >8 weeks;                               |
| The relationship between asthma control and quality-of-life impairment due to chronic cough: a real-life study | Braido, F.; Baiardini, I.; Balestracci, S.; Fassio, O.; Ravera, S.; Bellotti, M.; Canonica, G. W.                                                                                     | 2008 | Exclusion reason: Chronic cough was undefined or not >8 weeks;                               |
| Cough and sputum production are associated with frequent exacerbations and hospitalizations in COPD subjects   | Burgel, P. R.; Nesme-Meyer, P.; Chanez, P.; Caillaud, D.; Carre, P.; Perez, T.; Roche, N.; Initiatives Bronchopneumopathie Chronique Obstructive Scientific, Committee                | 2009 | Exclusion reason: Does not report statements that inform items or domains of cough severity; |
| Chronic respiratory diseases and quality of life in elderly nursing home residents                             | Carreiro-Martins, P.; Gomes-Belo, J.; Papoila, A. L.; Caires, I.; Palmeiro, T.; Gaspar-Marques, J.; Leiria-Pinto, P.; Mendes, A. S.; Paulo-Teixeira, J.; Botelho, M. A.; Neuparth, N. | 2016 | Exclusion reason: Chronic cough was undefined or not >8 weeks;                               |
| Chronic cough and phlegm in young adults                                                                       | Cerveri, I.; Accordini, S.; Corsico, A.; Zoia, M.C.; Carrozzi, L.; Cazzoletti, L.; Beccaria, M.; Marinoni, A.; Viegi, G.; De Marco, R.                                                | 2003 | Exclusion reason: Does not report statements that inform items or domains of cough severity; |
| Evaluation of vocal performance questionnaire in people with chronic refractory cough                          | Chamberlain, S.; Birring, S.; Clark, L.; Douiri, A.; Garrod, R.                                                                                                                       | 2013 | Exclusion reason: Conference abstract;                                                       |
| The impact of chronic cough: A European perspective                                                            | Chamberlain, S.; Masefield, S.; Powell, P.; Douiri, A.; Garrod, R.; Morice, A.; Birring, S.                                                                                           | 2013 | Exclusion reason: Conference abstract;                                                       |
| Severity, predictors, and impact of cough in idiopathic pulmonary fibrosis and systemic sclerosis-associated   | Cheng, J.; Wilcox, P. J.; Corte, T. J.; Murphy, D.; Hague, C. J.; Ryerson, C. J.                                                                                                      | 2017 | Exclusion reason: Conference abstract;                                                       |



|                                                                                                                                                                                                        |                                                                                                                                  |      |                                                                                              |
|--------------------------------------------------------------------------------------------------------------------------------------------------------------------------------------------------------|----------------------------------------------------------------------------------------------------------------------------------|------|----------------------------------------------------------------------------------------------|
| interstitial lung disease                                                                                                                                                                              |                                                                                                                                  |      |                                                                                              |
| The value of a symptom cluster of fatigue, dyspnea, and cough in predicting clinical outcomes in lung cancer survivors                                                                                 | Cheville, A. L.; Novotny, P. J.; Sloan, J. A.; Basford, J. R.; Wampfler, J. A.; Garces, Y. I.; Jatoi, A.; Yang, P.               | 2011 | Exclusion reason: Wrong indication;                                                          |
| Prevalence of respiratory disease and associated factors in an urban area of delhi                                                                                                                     | Chhabra, P.; Sharma, G.; Kannan, A. T.                                                                                           | 2008 | Exclusion reason: Does not report statements that inform items or domains of cough severity; |
| Urinary incontinence in chronic cough                                                                                                                                                                  | Cho, P. S. P.; Dicpinigaitis, P. V.; Fletcher, H. V.; Turner, R. D.; Birring, S. S.                                              | 2019 | Exclusion reason: Conference abstract;                                                       |
| The Burden of Cough and Phlegm in People With COPD: A COPD Patient-Powered Research Network Study                                                                                                      | Choate, R.; Pasquale, C. B.; Parada, N. A.; Prieto-Centurion, V.; Mularski, R. A.; Yawn, B. P.                                   | 2020 | Exclusion reason: Wrong indication;                                                          |
| Promis-29 scores associated with longitudinal changes in cough and phlegm severity in patients with copd within the chronic obstructive pulmonary disease patient-powered research network (copd pprn) | Choate, R.; Pasquale, C. B.; Parada, N. A.; Prieto-Centurion, V.; Yawn, B. P.                                                    | 2019 | Exclusion reason: Conference abstract;                                                       |
| Chronic cough and cough hypersensitivity syndrome                                                                                                                                                      | Chung, K. F.; McGarvey, L.; Mazzone, S.                                                                                          | 2016 | Exclusion reason: Wrong study design;                                                        |
| Measurement properties of an asthma symptom and rescue medication use diary                                                                                                                            | Clark, M.; Martin, S.; Svedsater, H.; Dale, P.; Jacques, L.                                                                      | 2015 | Exclusion reason: Wrong indication;                                                          |
| Sleep Disturbance and Fatigue as Consequences of Cough and Mucus Production in Chronic Obstructive Pulmonary Disease: Insights from a Patient Online                                                   | Cook, N. S.; Gey, J.; Oezel, B.; Mackay, A. J.; Kumari, C.; Kaur, V. P.; Larkin, N.; Harte, J.; Vergara Muro, S.; Gutzwiller, F. | 2018 | Exclusion reason: Conference abstract;                                                       |

|                                                                                                                                                                                       |                                                                                                                                  |      |                                                                                              |
|---------------------------------------------------------------------------------------------------------------------------------------------------------------------------------------|----------------------------------------------------------------------------------------------------------------------------------|------|----------------------------------------------------------------------------------------------|
| Bulletin Board Study                                                                                                                                                                  |                                                                                                                                  |      |                                                                                              |
| Impact of cough and mucus on COPD patients: primary insights from an exploratory study with an Online Patient Community                                                               | Cook, N.; Gey, J.; Oezel, B.; Mackay, A. J.; Kumari, C.; Kaur, V. P.; Larkin, N.; Harte, J.; Vergara-Muro, S.; Gutzwiller, F. S. | 2019 | Exclusion reason: Chronic cough was undefined or not >8 weeks;                               |
| Self-reported symptoms of chronic cough and breathlessness in working age men in the city of Izhevsk, Russia: Associations with cardiovascular disease risk factors and comorbidities | Cook, S.; Quint, J. K.; Vasiljev, M.; Leon, D. A.                                                                                | 2015 | Exclusion reason: Does not report statements that inform items or domains of cough severity; |
| Chronic cough as the sole presenting manifestation of bronchial asthma                                                                                                                | Corrao, W.M.; Braman, S.S.; Irwin, R.S.                                                                                          | 1979 | Exclusion reason: Does not report statements that inform items or domains of cough severity; |
| Urinary incontinence in adult patients with cystic fibrosis: Prevalence, impact on daily life and relationship with chronic cough                                                     | Crisafulli, E.; Faverzani, S.; Scandolo, P.; Longo, F.; Chetta, A. A.; Pisi, G.                                                  | 2018 | Exclusion reason: Conference abstract;                                                       |
| Persistent cough and sputum: prevalence and clinical characteristics in south east England                                                                                            | Cullinan, P.                                                                                                                     | 1992 | Exclusion reason: Does not report statements that inform items or domains of cough severity; |
| Upper airway disorders in patients with upper airway cough syndrome                                                                                                                   | Dabrowska, M.; Arcimowicz, M.; Grabczak, E. M.; Truba, O.; Rybka, A.; Bialek-Gosk, K.; Krenke, R.                                | 2020 | Exclusion reason: Conference abstract;                                                       |
| Impact of chronic cough in individuals with COPD: A population-based cohort study                                                                                                     | Dahl, M.; Landt, E.; Colak, Y.; Lange, P.; Laursen, L.; Nordestgaard, B.                                                         | 2019 | Exclusion reason: Conference abstract;                                                       |
| Cough: impact, beliefs, and expectations from a national survey                                                                                                                       | Dal Negro, R. W.; Mazzolini, M.; Turco, P.; Zanasi, A.                                                                           | 2016 | Exclusion reason: Wrong indication;                                                          |

|                                                                                                                                               |                                                                                                                                                                                                                                                                                   |      |                                                                                              |
|-----------------------------------------------------------------------------------------------------------------------------------------------|-----------------------------------------------------------------------------------------------------------------------------------------------------------------------------------------------------------------------------------------------------------------------------------|------|----------------------------------------------------------------------------------------------|
| Incidence of chronic obstructive pulmonary disease in a cohort of young adults according to the presence of chronic cough and phlegm          | de Marco, R.; Accordini, S.; Cerveri, I.; Corsico, A.; AntÃ³n, J. M.; KÃ¼nzli, N.; Janson, C.; Sunyer, J.; Jarvis, D.; Chinn, S.; Vermeire, P.; Svanes, C.; Ackermann-Liebrich, U.; Gislason, T.; Heinrich, J.; Leynaert, B.; Neukirch, F.; Schouten, J. P.; Wjst, M.; Burney, P. | 2007 | Exclusion reason: Does not report statements that inform items or domains of cough severity; |
| Chronic cough: how do cough reflex sensitivity and subjective assessments correlate with objective cough counts during ambulatory monitoring? | Decalmer, S. C.; Webster, D.; Kelsall, A. A.; McGuinness, K.; Woodcock, A. A.; Smith, J. A.                                                                                                                                                                                       | 2007 | Exclusion reason: Does not report statements that inform items or domains of cough severity; |
| Chronic cough: relationship between microaspiration, gastroesophageal reflux, and cough frequency                                             | Decalmer, S.; Stovold, R.; Houghton, L. A.; Pearson, J.; Ward, C.; Kelsall, A.; Jones, H.; McGuinness, K.; Woodcock, A.; Smith, J. A.                                                                                                                                             | 2012 | Exclusion reason: Does not report statements that inform items or domains of cough severity; |
| Impact of current cough on health-related quality of life in patients with COPD                                                               | Deslee, G.; Burgel, P. R.; Escamilla, R.; Chanez, P.; Court-Fortune, I.; Nesme-Meyer, P.; Brinchault-Rabin, G.; Perez, T.; Jebrak, G.; Caillaud, D.; Paillasseur, J. L.; Roche, N.                                                                                                | 2016 | Exclusion reason: Wrong indication;                                                          |
| Cough is an independent contributor to health-related quality of life impairment in COPD                                                      | Deslee, G.; Burgel, P. R.; Escamilla, R.; Chanez, P.; Court-Fortune, I.; Nesme-Meyer, P.; Brinchault-Rabin, G.; Perez, T.; Gebrak, G.; Caillaud, D.; Paillasseur, J. L.; Roche, N.                                                                                                | 2015 | Exclusion reason: Conference abstract;                                                       |
| The online Cough Clinic: developing guideline-based diagnosis and advice                                                                      | Dettmar, P. W.; Strugala, V.; Fathi, H.; Dettmar, H. J.; Wright, C.; Morice, A. H.                                                                                                                                                                                                | 2009 | Exclusion reason: Does not report statements that inform items or domains of cough severity; |
| Gastroesophageal reflux disease associates more with                                                                                          | DeVault, K.; Smith, J.; Lee, A.; Achem, S.; Houghton, L.                                                                                                                                                                                                                          | 2011 | Exclusion reason: Conference abstract;                                                       |

|                                                                                                                                |                                                                                             |      |                                                                                              |
|--------------------------------------------------------------------------------------------------------------------------------|---------------------------------------------------------------------------------------------|------|----------------------------------------------------------------------------------------------|
| cough than hoarseness in subjects aged over 65 years                                                                           |                                                                                             |      |                                                                                              |
| Prevalence of Urinary Incontinence in Women with Chronic Cough                                                                 | Dicpinigaitis, P.                                                                           | 2019 | Exclusion reason: Conference abstract;                                                       |
| Thoughts on one thousand chronic cough patients                                                                                | Dicpinigaitis, P. V.                                                                        | 2012 | Exclusion reason: Wrong study design;                                                        |
| Prevalence of depressive symptoms among patients with chronic cough                                                            | Dicpinigaitis, P. V.; Tso, R.; Banauch, G.                                                  | 2006 | Exclusion reason: Does not report statements that inform items or domains of cough severity; |
| A cross-sectional assessment of the burden of COPD symptoms in the US and Europe using the National Health and Wellness Survey | Ding, B.; DiBonaventura, M.; Karlsson, N.; Bergstrom, G.; Holmgren, U.                      | 2017 | Exclusion reason: Wrong indication;                                                          |
| Symptoms of autonomic dysfunction in chronic cough patients                                                                    | Dockry, R.; Gibbard, C.; Mitchell, J.; Corfield, D.; Smith, J.                              | 2016 | Exclusion reason: Conference abstract;                                                       |
| High prevalence of urinary incontinence in adult patients with bronchiectasis                                                  | Duignan, N.; McDonnell, M. J.; Mokoka, M. C.; Rutherford, R. M.                             | 2014 | Exclusion reason: Conference abstract;                                                       |
| Characterization of urge to cough and cough symptoms associated with the common cold: results of a US internet survey          | Eccles, R.; Dicpinigaitis, P.; Turner, R. B.; Druce, H. M.; Adeleke, M.; Mann, A. L.        | 2016 | Exclusion reason: Wrong indication;                                                          |
| Variability of respiratory symptoms in severe COPD                                                                             | Espinosa de los Monteros, M. J.; Pena, C.; Soto Hurtado, E. J.; Jareno, J.; Miravittles, M. | 2012 | Exclusion reason: Wrong indication;                                                          |
| Opinions on the definition of chronic cough and current treatment pathways: An international qualitative study                 | Faruqi, S.; Murdoch, R.; Morice, A. H.                                                      | 2014 | Exclusion reason: Conference abstract;                                                       |
| Chronic cough is a                                                                                                             | Field, S. K.; Conley, D. P.;                                                                | 2009 | Exclusion reason:                                                                            |

|                                                                                                        |                                                                                                                                                                                                                                                                                                     |      |                                                                                                                                   |
|--------------------------------------------------------------------------------------------------------|-----------------------------------------------------------------------------------------------------------------------------------------------------------------------------------------------------------------------------------------------------------------------------------------------------|------|-----------------------------------------------------------------------------------------------------------------------------------|
| woman's issue                                                                                          | Thawer, A. M.; Leigh, R.;<br>Cowie, R. L.                                                                                                                                                                                                                                                           |      | Conference abstract;                                                                                                              |
| The combined cough frequency/severity scoring: a new approach to cough evaluation in clinical settings | Fisman, E.Z.; Shapira, I.;<br>Motro, M.; Pines, A.;<br>Tenenbaum, A.                                                                                                                                                                                                                                | 2001 | Exclusion reason: Wrong study design;                                                                                             |
| Chronic cough: Objective cough frequency in a large cough clinic cohort                                | Fletcher, H.; Cho, P. S. P.;<br>Matos, S.; Wood, C.;<br>Fleming, T.; Turner, R.;<br>Birring, S.                                                                                                                                                                                                     | 2017 | Exclusion reason: Conference abstract;                                                                                            |
| A comparison of gender differences in health-related quality of life in acute and chronic coughers     | French, C. T.; Fletcher, K. E.;<br>Irwin, R. S.                                                                                                                                                                                                                                                     | 2005 | Exclusion reason: Post hoc analysis of an included study;                                                                         |
| Gender differences in health-related quality of life in patients complaining of chronic cough          | French, C. T.; Fletcher, K. E.;<br>Irwin, R. S.; French, Cynthia T.;<br>Fletcher, Kenneth E.; Irwin, Richard S.                                                                                                                                                                                     | 2004 | Exclusion reason: Post hoc analysis of an included study;                                                                         |
| Evaluation of a cough-specific quality-of-life questionnaire                                           | French, C. T.; Irwin, R. S.;<br>Fletcher, K. E.; Adams, T. M.;<br>French, Cynthia T.; Irwin, Richard S.;<br>Fletcher, Kenneth E.; Adams, Todd M.                                                                                                                                                    | 2002 | Exclusion reason: Study reports duplicate items with an included study (French, 1998)<br><br>*This study was included narratively |
| Clinical Characteristics of Cough Frequency Patterns in Patients with and without Asthma               | Fukuhara, A.; Saito, J.;<br>Birring, S. S.; Sato, S.;<br>Uematsu, M.; Suzuki, Y.;<br>Rikimaru, M.; Watanabe, N.;<br>Saito, M.; Kawamata, T.;<br>Umeda, T.; Togawa, R.;<br>Sato, Y.; Koizumi, T.; Hirai, K.;<br>Minemura, H.; Nikaido, T.;<br>Kanazawa, K.; Tanino, Y.;<br>Munakata, M.; Shibata, Y. | 2020 | Exclusion reason: Chronic cough was undefined or not >8 weeks;                                                                    |
| Does The Impact Of Cough On Quality Of Life In Bronchiectasis Depend On Prognosis?                     | Giron Moreno, R. M.;<br>Sanchez Azofra, A.; Aldave Orzaiz, B.;<br>Pastor Sanz, M. T.; Ancochea, J.                                                                                                                                                                                                  | 2018 | Exclusion reason: Wrong study design;                                                                                             |
| Respiratory symptoms and nocturnal                                                                     | Gislason, T.; Janson, C.;<br>Vermeire, P.; Plaschke, P.;                                                                                                                                                                                                                                            | 2002 | Exclusion reason: Chronic cough was undefined or not                                                                              |

|                                                                                                        |                                                                                                                                                                                                           |      |                                                                |
|--------------------------------------------------------------------------------------------------------|-----------------------------------------------------------------------------------------------------------------------------------------------------------------------------------------------------------|------|----------------------------------------------------------------|
| gastroesophageal reflux: a population-based study of young adults in three European countries          | Björnsön, E.; Gislason, D.; Boman, G.; Gislason, Thorarinn; Janson, Christer; Vermeire, Paul; Plaschke, Peter; Björnsön, Eythor; Gislason, David; Boman, Gunnar                                           |      | >8 weeks;                                                      |
| Health-related quality of life in idiopathic pulmonary fibrosis: Data from the Australian IPF Registry | Glaspole, I. N.; Chapman, S. A.; Cooper, W. A.; Ellis, S. J.; Goh, N. S.; Hopkins, P. M.; Macansh, S.; Mahar, A.; Moodley, Y. P.; Paul, E.; Reynolds, P. N.; Walters, E. H.; Zappala, C. J.; Corte, T. J. | 2017 | Exclusion reason: Wrong indication;                            |
| Symptoms and markers of symptom severity in asthma--content validity of the asthma symptom diary       | Globe, G.; Martin, M.; Schatz, M.; Wiklund, I.; Lin, J.; von Maltzahn, R.; Mattera, M. S.                                                                                                                 | 2015 | Exclusion reason: Wrong indication;                            |
| Gastroesophageal reflux symptoms in patients with chronic obstructive pulmonary disease                | Goseva, Z.; Gjorcev, A.; Jovanovska-Janeva, E.; Arbutina, S.                                                                                                                                              | 2014 | Exclusion reason: Wrong indication;                            |
| Patient-reported respiratory symptoms in cystic fibrosis                                               | Goss, C. H.; Edwards, T. C.; Ramsey, B. W.; Aitken, M. L.; Patrick, D. L.                                                                                                                                 | 2009 | Exclusion reason: Wrong indication;                            |
| Analysis of factors associated with the frequency of exacerbations in chronic cough                    | Gotera, C.; Mohremberger, C. J.; Pacheco, A.                                                                                                                                                              | 2014 | Exclusion reason: Conference abstract;                         |
| Are chronic cough and laryngopharyngeal reflux more common in obstructive sleep apnea patients?        | Gouveia, C. J.; Yalamanchili, A.; Ghadersohi, S.; Price, C. P. E.; Bove, M.; Attarian, H. P.; Tan, B. K.                                                                                                  | 2019 | Exclusion reason: Chronic cough was undefined or not >8 weeks; |
| Prevalence of inducible laryngeal obstruction (ILO) in unexplained chronic cough (UCC)                 | Gray, S.; Slinger, C.; Blakemore, J.; Marsden, P.                                                                                                                                                         | 2018 | Exclusion reason: Conference abstract;                         |
| Content validity of CASA-Q cough domains and UCSD-                                                     | Gries, K. S.; Esser, D.; Wiklund, I.                                                                                                                                                                      | 2013 | Exclusion reason: Wrong indication;                            |

|                                                                                                                                |                                                                                                                                                                                   |      |                                                                                              |
|--------------------------------------------------------------------------------------------------------------------------------|-----------------------------------------------------------------------------------------------------------------------------------------------------------------------------------|------|----------------------------------------------------------------------------------------------|
| SOBQ for use in patients with Idiopathic Pulmonary Fibrosis                                                                    |                                                                                                                                                                                   |      |                                                                                              |
| [Control of Respiratory Symptoms During Sleep in Patients with Stable Bronchial Asthma]                                        | Guenter, K.; Cassel, W.; Hildebrandt, O.; Kroenig, J.; Fischer, P.; Weissflog, A.; Vogelmeier, C.; Koehler, U.                                                                    | 2018 | Exclusion reason: Chronic cough was undefined or not >8 weeks;                               |
| [Management of chronic cough in France: A survey of clinical practice]                                                         | Guilleminault, L.; Brouquieres, D.; Messekher, M.; Dalphin, J. C.; Didier, A.; Escamilla, R.                                                                                      | 2019 | Exclusion reason: Does not report statements that inform items or domains of cough severity; |
| Cough in Patients With Lung Cancer: A Longitudinal Observational Study of Characterization and Clinical Associations           | Harle, A. S. M.; Blackhall, F. H.; Molassiotis, A.; Yorke, J.; Dockry, R.; Holt, K. J.; Yuill, D.; Baker, K.; Smith, J. A.                                                        | 2019 | Exclusion reason: Wrong indication;                                                          |
| The "Clic" cough in lung cancer study: The characterisation of cough in lung cancer                                            | Harle, A. S. M.; Molassiotis, A.; Smith, J.; Blackhall, F.                                                                                                                        | 2013 | Exclusion reason: Wrong indication;                                                          |
| A cross sectional study to determine the prevalence of cough and its impact in patients with lung cancer: a patient unmet need | Harle, A.; Molassiotis, A.; Buffin, O.; Burnham, J.; Smith, J.; Yorke, J.; Blackhall, F. H.                                                                                       | 2020 | Exclusion reason: Wrong indication;                                                          |
| Chronic idiopathic cough: a discrete clinical entity?                                                                          | Haque, R. A.; Usmani, O. S.; Barnes, P. J.                                                                                                                                        | 2005 | Exclusion reason: Does not report statements that inform items or domains of cough severity; |
| Cough and phlegm are important predictors of health status in smokers without COPD                                             | Heijdra, Y. F.; Pinto-Plata, V. M.; Kenney, L. A.; Rassulo, J.; Celli, B. R.; Heijdra, Yvonne F.; Pinto-Plata, Victor M.; Kenney, Lawrence A.; Rassulo, John; Celli, Bartolome R. | 2002 | Exclusion reason: Wrong indication;                                                          |
| Exacerbation of daily cough and allergic symptoms in adult patients with chronic cough by Asian dust:                          | Higashi, T.; Kambayashi, Y.; Ohkura, N.; Fujimura, M.; Nakanishi, S.; Yoshizaki, T.; Saijoh, K.; Hayakawa, K.; Kobayashi,                                                         | 2014 | Exclusion reason: Chronic cough was undefined or not >8 weeks;                               |

|                                                                                                                                                                   |                                                                                                    |      |                                        |
|-------------------------------------------------------------------------------------------------------------------------------------------------------------------|----------------------------------------------------------------------------------------------------|------|----------------------------------------|
| A hospital-based study in Kanazawa                                                                                                                                | F.; Michigami, Y.; Hitomi, Y.; Nakamura, H.                                                        |      |                                        |
| High prevalence and impact of gerd in patients with persistent cough: An experience from a specialist clinic in Japan                                             | Hijkata, H.; Takemura, M.; Asano, T.; Ichikawa, H.; Niimi, A.                                      | 2014 | Exclusion reason: Conference abstract; |
| Health-seeking behaviour among adults with prolonged cough in Vietnam                                                                                             | Hoa, N. B.; Tiemersma, E. W.; Sy, D. N.; Nhung, N. V.; Vree, M.; Borgdorff, M. W.; Cobelens, F. G. | 2011 | Exclusion reason: Wrong indication;    |
| When is a Cough Just a Cough? The Issue of Quality of Life and Its Assessment                                                                                     | Hollenberg, N. K.                                                                                  | 1994 | Exclusion reason: Wrong study design;  |
| The association of cough-related quality-of-life, cough symptom scores and cough reflex sensitivity with markers of disease control in severe asthma              | Holmes, J.; Heaney, L.; Birring, S.; McGarvey, L.                                                  | 2018 | Exclusion reason: Conference abstract; |
| Longitudinal studies of cough in idiopathic pulmonary fibrosis                                                                                                    | Hope-Gill, B.; Kilduff, C.; Harrison, N. K.                                                        | 2012 | Exclusion reason: Conference abstract; |
| Cough-specific quality of life: Relationship to gastroesophageal reflux in patients with chronic cough                                                            | Houghton, L.; Lee, A.; Bansal, V.; Mangi, M. A.; Devault, K.                                       | 2015 | Exclusion reason: Conference abstract; |
| Impact of cough and urinary incontinence on quality of life in women and men with chronic obstructive pulmonary disease                                           | Hrisanfow, E.; Hagglund, D.                                                                        | 2013 | Exclusion reason: Wrong indication;    |
| The modified Medical Research Council dyspnoea scale is a good indicator of health-related quality of life in patients with chronic obstructive pulmonary disease | Hsu, K. Y.; Lin, J. R.; Lin, M. S.; Chen, W.; Chen, Y. J.; Yan, Y. H.                              | 2013 | Exclusion reason: Wrong indication;    |



|                                                                                                                        |                                                                                                                                         |      |                                                                                              |
|------------------------------------------------------------------------------------------------------------------------|-----------------------------------------------------------------------------------------------------------------------------------------|------|----------------------------------------------------------------------------------------------|
| An evaluation of a throat discomfort visual analogue scale in chronic cough                                            | Hull, J. H.; Walsted, E. S.; Pavitt, M. J.; Tidmarsh, B.; Selby, J.                                                                     | 2020 | Exclusion reason: Wrong study design;                                                        |
| Psychological profile of individuals presenting with chronic cough                                                     | Hulme, K.; Deary, V.; Dogan, S.; Parker, S. M.                                                                                          | 2017 | Exclusion reason: Does not report statements that inform items or domains of cough severity; |
| Chronic persistent cough and clearance of esophageal acid                                                              | Ing, A.J.; Ngu, M.C.; Breslin, A.B.                                                                                                     | 1992 | Exclusion reason: Does not report statements that inform items or domains of cough severity; |
| Pathogenesis of chronic persistent cough associated with gastroesophageal reflux                                       | Ing, A.J.; Ngu, M.C.; Breslin, A.B.                                                                                                     | 1994 | Exclusion reason: Does not report statements that inform items or domains of cough severity; |
| Chronic persistent cough in the adult: the spectrum and frequency of causes and successful outcome of specific therapy | Irwin, R.S.; Corrao, W.M.; Pratter, M.R.                                                                                                | 1981 | Exclusion reason: Does not report statements that inform items or domains of cough severity; |
| Interpreting the histopathology of chronic cough: a prospective, controlled, comparative study                         | Irwin, R.S.; Ownbey, R.; Cagle, P.T.; Baker, S.; Fraire, A.E.                                                                           | 2006 | Exclusion reason: Does not report statements that inform items or domains of cough severity; |
| Interstitial lung disease patient-reported cough management strategies: Don't move, don't talk                         | Jacobs, S. S.; Swigris, J. J.; Rosen, G.                                                                                                | 2014 | Exclusion reason: Conference abstract;                                                       |
| Determinants of cough in young adults participating in the European Community Respiratory Health Survey                | Janson, C.; Chinn, S.; Jarvis, D.; Burney, P.                                                                                           | 2001 | Exclusion reason: Does not report statements that inform items or domains of cough severity; |
| Development and first validation of the cough assessment test (COAT)                                                   | Jang, S. H.; Kim, J. H.; Koo, H. K.; Jeong, I.; Park, S. Y.; Kim, D. G.; Rhee, C. K.; Kim, Y. H.; Kim, S. K.; Choi, E. Y.; Moon, J. Y.; | 2017 | Exclusion reason: Conference abstract;                                                       |

|                                                                                                                                 |                                                                                                                                                       |      |                                                                                              |
|---------------------------------------------------------------------------------------------------------------------------------|-------------------------------------------------------------------------------------------------------------------------------------------------------|------|----------------------------------------------------------------------------------------------|
|                                                                                                                                 | Shin, J. W.; Kim, J. W.;<br>Min, K. H.; Kim, D. K.;<br>Lee, H.; Yoon, H. K.; Kim,<br>H. J.                                                            |      |                                                                                              |
| The impact of COPD on health status: findings from the BOLD study                                                               | Janson, C.; Marks, G.; Buist, S.; Gnatiuc, L.; Gislason, T.; McBurnie, M. A.; Nielsen, R.; Studnicka, M.; Toelle, B.; Benediktsdottir, B.; Burney, P. | 2013 | Exclusion reason: Wrong indication;                                                          |
| Prevalence of chronic cough and rural-urban differences in risk factors associated with chronic cough in india                  | Jarhyan, P.; Ghosh, S.; Hutchinson, A.; Venkateshmurthy, N. S.; Khatkar, R.; Gummudi, B.; Prabhakaran, D.; Mohan, S.                                  | 2017 | Exclusion reason: Conference abstract;                                                       |
| Clinical course of laryngo-respiratory symptoms in gastro-oesophageal reflux disease during routine care--a 5-year follow-up    | Jaspersen, D.; Nocon, M.; Labenz, J.; Leodolter, A.; Richter, K.; Stolte, M.; Vieth, M.; Lind, T.; Willich, S. N.; Malfertheiner, P.                  | 2009 | Exclusion reason: Wrong indication;                                                          |
| Clinical course of extra-esophageal disorders in gastroesophageal reflux disease during routine care: A 5-year follow-up study  | Jaspersen, D.; Nocon, M.; Labenz, J.; Leodolter, A.; Richter, K.; Stolte, M.; Vieth, M.; Lind, T.; Willich, S. N.; Malfertheiner, P.                  | 2009 | Exclusion reason: Conference abstract;                                                       |
| Correlation between chronic cough and chronic rhinosinusitis in adults: Nationwide, population-based, and cross-sectional study | Jeon, S.; Joo, Y.; Kim, S.; Cho, H.                                                                                                                   | 2017 | Exclusion reason: Conference abstract;                                                       |
| Induced sputum concentrations of mucin in patients with asthma and chronic cough                                                | Jinnai, M.; Niimi, A.; Ueda, T.; Matsuoka, H.; Takemura, M.; Yamaguchi, M.; Otsuka, K.; Oguma, T.; Takeda, T.; Ito, I.; Matsumoto, H.; Mishima, M.    | 2010 | Exclusion reason: Does not report statements that inform items or domains of cough severity; |
| A self-complete measure of health status for chronic airflow limitation                                                         | Jones, P.W.; Quirk, F.H.; Baveystock, C.M.; Littlejohns, P.                                                                                           | 1992 | Exclusion reason: Wrong indication;                                                          |

|                                                                                                                                        |                                                                                                                                                                                    |      |                                                                                              |
|----------------------------------------------------------------------------------------------------------------------------------------|------------------------------------------------------------------------------------------------------------------------------------------------------------------------------------|------|----------------------------------------------------------------------------------------------|
| Clinical characteristics of chronic cough: Adult chronic cough cohort study of South Korea                                             | Joon, A. T.; Rhee, C. K.; Lee, J. M.; Yoon, H. K.                                                                                                                                  | 2018 | Exclusion reason: Conference abstract;                                                       |
| The Assessment of Cough in a Sarcoidosis Clinic Using a Validated instrument and a Visual Analog Scale                                 | Judson, M. A.; Chopra, A.; Conuel, E.; Koutroumpakis, E.; Schafer, C.; Austin, A.; Zhang, R.; Cao, K.; Berry, R.; Khan, Mmhs; Modi, A.; Modi, R.; Jou, S.; Ilyas, F.; Yucel, R. M. | 2017 | Exclusion reason: Chronic cough was undefined or not >8 weeks;                               |
| Prevalence of urinary incontinence in older Turkish women, risk factors, and effect on activities of daily living                      | KaÄŸÄ±kÄŸÄ±, MaÄŸfiret; KÄ±lÄ±ÄŸ, Dilek; AvÄŸar, GÄŸlÄŸin; Äžirin, Meltem                                                                                                          | 2015 | Exclusion reason: Wrong indication;                                                          |
| Evaluation and impact of chronic cough: comparison of specific vs generic quality-of-life questionnaires                               | Kalpaklioglu, A. F.; Kara, T.; Kurtipek, E.; Kocyigit, P.; Ekici, A.; Eciki, M.                                                                                                    | 2005 | Exclusion reason: Does not report statements that inform items or domains of cough severity; |
| Cough related to swallowing in asthma patients                                                                                         | Kamimura, M.; Mouri, A.; Takayama, K.; Mizutani, T.; Hamamoto, Y.; Iikura, M.; Furihata, K.                                                                                        | 2019 | Exclusion reason: Chronic cough was undefined or not >8 weeks;                               |
| Clinical impact of gastroesophageal reflux disease in patients with subacute/chronic cough                                             | Kanemitsu, Y.; Kurokawa, R.; Takeda, N.; Takemura, M.; Fukumitsu, K.; Asano, T.; Yap, J.; Suzuki, M.; Fukuda, S.; Ohkubo, H.; Maeno, K.; Ito, Y.; Oguri, T.; Niimi, A.             | 2019 | Exclusion reason: Chronic cough was undefined or not >8 weeks;                               |
| Gastroesophageal dysmotility is associated with the impairment of cough-specific quality of life in patients with cough variant asthma | Kanemitsu, Y.; Niimi, A.; Matsumoto, H.; Iwata, T.; Ito, I.; Oguma, T.; Inoue, H.; Tajiri, T.; Nagasaki, T.; Izuhara, Y.; Petrova, G.; Birring, S. S.; Mishima, M.                 | 2016 | Exclusion reason: Does not report statements that inform items or domains of cough severity; |
| Epidemiology of chronic cough in Korea: A nationwide database analysis (2010-2012)                                                     | Kang, M. G.; Song, W. J.; Chang, Y. S.; Kim, S. S.; Kim, M. K.; Chang, S. I.; Min, K. U.; Cho, S. H.                                                                               | 2015 | Exclusion reason: Conference abstract;                                                       |

|                                                                                                                                                                              |                                                                                                                                                                                 |      |                                                                                              |
|------------------------------------------------------------------------------------------------------------------------------------------------------------------------------|---------------------------------------------------------------------------------------------------------------------------------------------------------------------------------|------|----------------------------------------------------------------------------------------------|
| Point prevalence and epidemiological characteristics of chronic cough in the general adult population: The Korean National Health and Nutrition Examination Survey 2010-2012 | Kang, M. G.; Song, W. J.; Kim, H. J.; Won, H. K.; Sohn, K. H.; Kang, S. Y.; Jo, E. J.; Kim, M. H.; Kim, S. H.; Park, H. W.; Chang, Y. S.; Lee, B. J.; Morice, A. H.; Cho, S. H. | 2017 | Exclusion reason: Does not report statements that inform items or domains of cough severity; |
| Cough in the elderly community population: A cross-sectional analysis of risk factors and its impacts on quality of life                                                     | Kang, M. G.; Song, W. J.; Kim, M. H.; Kim, M. Y.; Lee, S. E.; Cho, E. J.; Kim, S. H.; Kang, H. R.; Jang, H. C.; Kim, K. W.; Cho, S. H.; Min, K. U.; Chang, Y. S.                | 2013 | Exclusion reason: Conference abstract;                                                       |
| Which Drives Chronicity of Cough in Adults: Based on the Knhanes 2010-2012                                                                                                   | Kang, M.; Cho, B. H.; Park, H. K.; Kim, K. M.; Park, C. H.; Park, H. W.; Chang, Y. S.; Song, S. H.; Kim, M. K.; Cho, S. H.; Chang, S. I.; Min, K. U.; Morice, A.                | 2016 | Exclusion reason: Conference abstract;                                                       |
| Cough persistence in adults with chronic cough: A 4-year retrospective cohort study                                                                                          | Kang, S. Y.; Song, W. J.; Won, H. K.; Chung, S. J.; Kim, J. Y.; Park, H. W.; Morice, A. H.; Cho, S. H.                                                                          | 2020 | Exclusion reason: Does not report statements that inform items or domains of cough severity; |
| Frequent exacerbations of COPD are associated with severity of airflow limitation and chronic cough, sputum production                                                       | Karim, K.; Taright, S.; Fissah, A.                                                                                                                                              | 2019 | Exclusion reason: Conference abstract;                                                       |
| Measurement of gastric emptying in gastroesophageal reflux-related chronic cough                                                                                             | Kastelik, Jack A.; Jackson, Warren; Davies, Trevor W.; Wright, Graham A.; Redington, Anthony E.; Wedgwood, Kevin R.; Morice, Alyn H.                                            | 2002 | Exclusion reason: Does not report statements that inform items or domains of cough severity; |
| Development of a useful diagnostic scoring system for asthma in patients with subacute or chronic cough                                                                      | Katayama, Y.; Marumo, S.; Amimono, H.; Shiraishi, Y.; Yamaki, H.; Takashima, R.; Kotani, A.; Shirata, M.; Shima, H.; Kawashima, S.; Kitajima, T.; Inoue, D.                     | 2016 | Exclusion reason: Conference abstract;                                                       |

|                                                                                                                                                                                   |                                                                                                                                                                       |      |                                                                                              |
|-----------------------------------------------------------------------------------------------------------------------------------------------------------------------------------|-----------------------------------------------------------------------------------------------------------------------------------------------------------------------|------|----------------------------------------------------------------------------------------------|
|                                                                                                                                                                                   | Itotani, R.; Sakuramoto, M.; Fukui, M.                                                                                                                                |      |                                                                                              |
| The challenges of living with severe asthma in Europe                                                                                                                             | Katsaounou, P.; Conde, L. G.; Kroegel, C.; Gore, R.; Menzella, F.; Quirce, S.; Morais-Almeida, M.; Gasser, M.; Kasujee, I.                                            | 2017 | Exclusion reason: Conference abstract;                                                       |
| Still fighting for breath: A patient survey of the challenges and impact of severe asthma                                                                                         | Katsaounou, P.; Odemyr, M.; Spranger, O.; Hyland, M. E.; Kroegel, C.; Conde, L. G.; Gore, R.; Menzella, F.; Ribas, C. D.; Morais-Almeida, M.; Gasser, M.; Kasujee, I. | 2018 | Exclusion reason: Wrong indication;                                                          |
| Prevalence of chronic cough in a population based survey                                                                                                                          | Kaushik, N.; Smith, J.; Linehan, M.; Frank, T.                                                                                                                        | 2015 | Exclusion reason: Conference abstract;                                                       |
| Sex differences and predictors of objective cough frequency in chronic cough                                                                                                      | Kelsall, A.; Decalmer, S.; McGuinness, K.; Woodcock, A.; Smith, J. A.                                                                                                 | 2009 | Exclusion reason: Does not report statements that inform items or domains of cough severity; |
| Objective cough frequency in Idiopathic Pulmonary Fibrosis                                                                                                                        | Key, A. L.; Holt, K.; Hamilton, A.; Smith, J. A.; Earis, J. E.                                                                                                        | 2010 | Exclusion reason: Wrong indication;                                                          |
| Objective cough count in bronchiectasis patients is reproducible and relates to quality of life                                                                                   | Key, A.; Holt, K.; Smith, J.; Walker, P.                                                                                                                              | 2019 | Exclusion reason: Conference abstract;                                                       |
| Evaluation of balance, depression, cough strength and life quality according to COPD                                                                                              | Kilinc, M.; Yilmaz, A.; Altinisik, G.; Metin, M.; Ugurlu, E.; Atalay, O. T.                                                                                           | 2019 | Exclusion reason: Conference abstract;                                                       |
| Chronic cough is associated with depressive mood in general population and COPD; analysis of data from Korean national health and nutrition examination survey from 2014 and 2016 | Kim, H. C.; Kim, J. Y.; Kim, T. H.                                                                                                                                    | 2019 | Exclusion reason: Conference abstract;                                                       |
| Chronic Cough Is Associated with                                                                                                                                                  | Kim, H. C.; Kim, J. Y.; Kim, T. H.                                                                                                                                    | 2019 | Exclusion reason: Conference abstract;                                                       |

|                                                                                                                                                           |                                                                                                                                                                                                                                                                                           |      |                                                                                              |
|-----------------------------------------------------------------------------------------------------------------------------------------------------------|-------------------------------------------------------------------------------------------------------------------------------------------------------------------------------------------------------------------------------------------------------------------------------------------|------|----------------------------------------------------------------------------------------------|
| Depressive Mood in General Population and Copd Patients: Analysis of Data from Korean National Health and Nutrition Examination Survey from 2014 and 2016 |                                                                                                                                                                                                                                                                                           |      |                                                                                              |
| Chronic cough is associated with depressive mood in general population and COPD; Analysis of data from Korean National Health and                         | Kim, H. C.; Kim, J. Y.; Kim, T. H. K.                                                                                                                                                                                                                                                     | 2019 | Exclusion reason: Conference abstract;                                                       |
| Prevalence of chronic cough and possible causes in the general population based on the Korean National Health and Nutrition Examination Survey            | Koo, H. K.; Jeong, I.; Lee, S. W.; Park, J.; Kim, J. H.; Park, S. Y.; Park, H. Y.; Rhee, C. K.; Kim, Y. H.; Jung, J. Y.; Kim, S. K.; Choi, E. Y.; Moon, J. Y.; Shin, J. W.; Kim, J. W.; Min, K. H.; Kim, S. W.; Yoo, K. H.; Jang, S. H.; Yoon, H. K.; Kim, H. J.; Jung, K. S.; Kim, D. K. | 2016 | Exclusion reason: Does not report statements that inform items or domains of cough severity; |
| Different phenotypes and severity according to different causes of chronic cough                                                                          | Koo, H.; Kang, H.; Park, H.; Park, S.; Lee, S.; Kim, D.                                                                                                                                                                                                                                   | 2019 | Exclusion reason: Conference abstract;                                                       |
| Chronic cough as a novel phenotype of chronic obstructive pulmonary disease                                                                               | Koo, H.K.; Park, S.W.; Park, J.W.; Choi, H.S.; Kim, T.H.; Yoon, H.K.; Yoo, K.H.; Jung, K.S.; Kim, D.K.                                                                                                                                                                                    | 2018 | Exclusion reason: Does not report statements that inform items or domains of cough severity; |
| Six months follow up of cough-related health status in a large population of patients from the Isala cough clinic                                         | Kooistra, L.; Vaessen, D.; Patberg, N.; Van Den Berg, J.                                                                                                                                                                                                                                  | 2015 | Exclusion reason: Conference abstract;                                                       |
| Long-term prognosis of chronic cough: a prospective, observational cohort study                                                                           | Koskela, H. O.; Latti, A. M.; Purokivi, M. K.                                                                                                                                                                                                                                             | 2017 | Exclusion reason: Does not report statements that inform items or domains of cough severity; |
| Cluster analysis in 975                                                                                                                                   | Koskela, H. O.; Selander, T.                                                                                                                                                                                                                                                              | 2020 | Exclusion reason: Chronic                                                                    |

|                                                                                                                                    |                                                                                                            |      |                                                                                              |
|------------------------------------------------------------------------------------------------------------------------------------|------------------------------------------------------------------------------------------------------------|------|----------------------------------------------------------------------------------------------|
| patients with current cough identifies a phenotype with several cough triggers, many background disorders, and low quality of life | A.; Lätti, A. M.                                                                                           |      | cough was undefined or not >8 weeks;                                                         |
| Cluster analysis in 975 patients with current cough                                                                                | Koskela, H. O.; Selander, T.; Latti, A. M.                                                                 | 2020 | Exclusion reason: Conference abstract;                                                       |
| COPD assessment test and severity of airflow limitation in patients with asthma, COPD, and asthma-COPD overlap syndrome            | Kurashima, K.; Takaku, Y.; Ohta, C.; Takayanagi, N.; Yanagisawa, T.; Sugita, Y.                            | 2016 | Exclusion reason: Wrong indication;                                                          |
| The development of a cough hypersensitivity questionnaire (CHQ)                                                                    | La-Crette, J.; Lee, K. K.; Chamberlain, S.; Saito, J.; Hull, J.; Chung, K. F.; Birring, S. S.              | 2012 | Exclusion reason: Conference abstract;                                                       |
| Chinese national guidelines on diagnosis and management of cough: Consensus and controversy                                        | Lai, K.                                                                                                    | 2014 | Exclusion reason: Wrong study design;                                                        |
| A prospective, multicenter survey on causes of chronic cough in China                                                              | Lai, K.; Chen, R.; Lin, J.; Huang, K.; Shen, H.; Kong, L.; Zhou, X.; Luo, Z.; Yang, L.; Wen, F.; Zhong, N. | 2013 | Exclusion reason: Does not report statements that inform items or domains of cough severity; |
| The association between esophageal dysmotility and cough                                                                           | Lalehzari, M.; Chaudhuri, S.; Gaeta, M.; Nguyen, M.; Ryabtsev, R.; Masoud, A.; Sanchez, M. J.              | 2019 | Exclusion reason: Conference abstract;                                                       |
| Incomplete Esophageal Bolus Clearance Is Associated with Increased Cough Severity                                                  | Lalehzari, M.; Chaudhuri, S.; Nguyen, M.; Masoud, A.; Sanchez, M. J.                                       | 2019 | Exclusion reason: Conference abstract;                                                       |
| Persistence of chronic cough in a community-based population                                                                       | Latti, A. M.; Pekkanen, J.; Koskela, H. O.                                                                 | 2020 | Exclusion reason: Study reports duplicate items with an included study;                      |
| Predictors of prolongation in recent-onset cough                                                                                   | Latti, A. M.; Pekkanen, J.; Koskela, H. O.                                                                 | 2019 | Exclusion reason: Chronic cough was undefined or not >8 weeks;                               |
| The Clinical Value of Deflation Cough in Chronic Coughers                                                                          | Lavorini, F.; Chellini, E.; Bigazzi, F.; Surrenti, E.; Fontana, G. A.                                      | 2016 | Exclusion reason: Does not report statements that inform items or domains of cough           |

|                                                                                                                                   |                                                                                                                                  |      |                                                                |
|-----------------------------------------------------------------------------------------------------------------------------------|----------------------------------------------------------------------------------------------------------------------------------|------|----------------------------------------------------------------|
| With Reflux Symptoms                                                                                                              |                                                                                                                                  |      | severity;                                                      |
| Epidemiology, Etiology, and Clinical Impact of Chronic Cough in a Primary Care Setting: Results from a Healthcare Provider Survey | Le, A.; Prenner, B.                                                                                                              | 2019 | Exclusion reason: Conference abstract;                         |
| Cough-specific quality of life: Relationship to gastroesophageal reflux in patients with chronic cough                            | Lee, A.; Bansal, V.; Asif Mangi, M.; DeVault, K. R.; Houghton, L. A.                                                             | 2015 | Exclusion reason: Conference abstract;                         |
| Different impacts of respiratory symptoms and comorbidities on COPD-specific health-related quality of life by COPD severity      | Lee, H.; Jhun, B. W.; Cho, J.; Yoo, K. H.; Lee, J. H.; Kim, D. K.; Lee, J. D.; Jung, K. S.; Lee, J. Y.; Park, H. Y.              | 2017 | Exclusion reason: Wrong indication;                            |
| Reflux episode reaching the proximal esophagus are associated with chronic cough                                                  | Lee, J. H.; Park, S. Y.; Cho, S. B.; Lee, W. S.; Park, C. H.; Koh, Y. I.; Joo, Y. E.; Kim, H. S.; Choi, S. K.; Rew, J. S.        | 2012 | Exclusion reason: Chronic cough was undefined or not >8 weeks; |
| Maximum cough pressures are increased in patients with chronic cough                                                              | Lee, K. K.; Ward, K.; Rafferty, G. F.; Moxham, J.; Birring, S. S.                                                                | 2011 | Exclusion reason: Conference abstract;                         |
| Measuring respiratory symptoms of COPD: performance of the EXACT- Respiratory Symptoms Tool (E-RS) in three clinical trials       | Leidy, N. K.; Murray, L. T.; Monz, B. U.; Nelsen, L.; Goldman, M.; Jones, P. W.; Dansie, E. J.; Sethi, S.                        | 2014 | Exclusion reason: Wrong indication;                            |
| Measuring respiratory symptoms in clinical trials of COPD: reliability and validity of a daily diary                              | Leidy, N. K.; Sexton, C. C.; Jones, P. W.; Notte, S. M.; Monz, B. U.; Nelsen, L.; Goldman, M.; Murray, L. T.; Sethi, S.          | 2014 | Exclusion reason: Wrong indication;                            |
| Respiratory diseases and the impact of cough in Taiwan: Results from the APBORD                                                   | Lin, H. C.; Cho, S. H.; Ghoshal, A. G.; Muttalif, A. R.; Thanaviratnanich, S.; Bagga, S.; Faruqi, R.; Sajjan, S.; Cahill, C. L.; | 2016 | Exclusion reason: Chronic cough was undefined or not >8 weeks; |



|                                                                                                                                                         |                                                                                                                                         |      |                                                                                              |
|---------------------------------------------------------------------------------------------------------------------------------------------------------|-----------------------------------------------------------------------------------------------------------------------------------------|------|----------------------------------------------------------------------------------------------|
| observational study                                                                                                                                     | Hamrosi, K. K.; Wang de, Y.                                                                                                             |      |                                                                                              |
| Chronic respiratory disease and mental health: The Guangzhou Biobank cohort study                                                                       | Loerbroks, A.; Jiang, C. Q.; Lam, K. B. H.; Bosch, J. A.; Thomas, G. N.; Zhang, W. S.; Cheng, K. K.; Lam, T. H.; Adab, P.               | 2011 | Exclusion reason: Conference abstract;                                                       |
| Psychological impact in cough hypersensitivity syndrome                                                                                                 | Ludlow, S. F.; Haines, J.; Hope, H.; Marsden, P.; Fowler, S.                                                                            | 2019 | Exclusion reason: Conference abstract;                                                       |
| Habitual coughing and its associations with asthma, anxiety, and gastroesophageal reflux                                                                | Ludviksdottir, D.; Bjornsson, E.; Janson, C.; Boman, G.; L dv ksd ttir, D.; Bj rnsson, E.                                               | 1996 | Exclusion reason: Chronic cough was undefined or not >8 weeks;                               |
| Postnasal drip and chronic cough: An open interventional study                                                                                          | Macedo, P.; Saleh, H.; Torrego, A.; Arbery, J.; MacKay, I.; Durham, S. R.; Chung, K. F.                                                 | 2009 | Exclusion reason: Does not report statements that inform items or domains of cough severity; |
| Management of chronic cough in primary care                                                                                                             | Mackley, R.; Schatzberger, T.; Parker, S. M.                                                                                            | 2013 | Exclusion reason: Conference abstract;                                                       |
| Quality of life in patients with bronchiectasis: a 2-year longitudinal study                                                                            | Magge, A.; Ashraf, S.; Quittner, A. L.; Metersky, M. L.                                                                                 | 2019 | Exclusion reason: Wrong indication;                                                          |
| Prevalence, risk factors and clinical correlates of COPD in a rural setting in Tanzania                                                                 | Magitta, N. F.; Walker, R. W.; Apte, K. K.; Shimwela, M. D.; Mwaiselage, J. D.; Sanga, A. A.; Namdeo, A. K.; Madas, S. J.; Salvi, S. S. | 2018 | Exclusion reason: Does not report statements that inform items or domains of cough severity; |
| Mixed-methods content and sentiment analysis of adolescents' voice diaries describing daily experiences with asthma and self-management decision-making | Mammen, J. R.; Java, J. J.; Rhee, H.; Butz, A. M.; Halterman, J. S.; Arcoleo, K.                                                        | 2019 | Exclusion reason: Pediatric population;                                                      |
| Prevalence of unknown asthma and COPD in people with persistent or recurrent cough                                                                      | Marklund, B.; Tuns ter, A.; Eggertsen, R.; Fridlund, B.                                                                                 | 2006 | Exclusion reason: Chronic cough was undefined or not >8 weeks;                               |

|                                                                                                                     |                                                                                                                                                                                                                                         |      |                                                                                              |
|---------------------------------------------------------------------------------------------------------------------|-----------------------------------------------------------------------------------------------------------------------------------------------------------------------------------------------------------------------------------------|------|----------------------------------------------------------------------------------------------|
| Cough, airway inflammation and asthma control                                                                       | Marsden, P. A.; Ibrahim, B.; Yates, L.; Woodcock, A.; Fowler, S. J.; Smith, J. A.                                                                                                                                                       | 2009 | Exclusion reason: Conference abstract;                                                       |
| Objective Cough Frequency, Airway Inflammation, and Disease Control in Asthma                                       | Marsden, P. A.; Satia, I.; Ibrahim, B.; Woodcock, A.; Yates, L.; Donnelly, I.; Jolly, L.; Thomson, N. C.; Fowler, S. J.; Smith, J. A.                                                                                                   | 2016 | Exclusion reason: Wrong indication;                                                          |
| A comparison of objective and subjective measures of cough in asthma                                                | Marsden, P. A.; Smith, J. A.; Kelsall, A. A.; Owen, E.; Naylor, J. R.; Webster, D.; Sumner, H.; Alam, U.; McGuinness, K.; Woodcock, A. A.                                                                                               | 2008 | Exclusion reason: Wrong indication;                                                          |
| Idiopathic chronic productive cough and response to open-label macrolide therapy: An observational study            | Martin, M. J.; Lee, H.; Clayton, C.; Pointon, K.; Soomro, I.; Shaw, D. E.; Harrison, T. W.                                                                                                                                              | 2019 | Exclusion reason: Does not report statements that inform items or domains of cough severity; |
| Risks and Cough-Aggravating Factors in Prolonged Cough. Epidemiological Observations from the Nagahama Cohort Study | Matsumoto, H.; Izuhara, Y.; Niimi, A.; Tabara, Y.; Nagasaki, T.; Kanemitsu, Y.; Murase, K.; Oguma, T.; Ito, I.; Muro, S.; Sekine, A.; Matsuda, F.; Kosugi, S.; Nakayama, T.; Chin, K.; Mishima, M.; Nagahama Study Collaboration, Group | 2017 | Exclusion reason: Chronic cough was undefined or not >8 weeks;                               |
| Triggers of cough in patients with prolonged or chronic cough and their relation to pathophysiology                 | Matsumoto, H.; Niimi, A.; Inoue, H.; Ito, I.; Otsuka, K.; Takeda, T.; Oguma, T.; Nakaji, H.; Tajiri, T.; Iwata, T.; Jinnai, M.; Yamaguchi, M.; Mishima, M.                                                                              | 2011 | Exclusion reason: Conference abstract;                                                       |
| Cough triggers and their pathophysiology in patients with prolonged or chronic cough                                | Matsumoto, H.; Tabuena, R. P.; Niimi, A.; Inoue, H.; Ito, I.; Yamaguchi, M.; Otsuka, K.; Takeda, T.; Oguma, T.; Nakaji, H.; Tajiri, T.; Iwata, T.; Nagasaki, T.; Jinnai, M.; Matsuoka, H.; Mishima, M.                                  | 2012 | Exclusion reason: Chronic cough was undefined or not >8 weeks;                               |
| Prevalence of psych morbidity among patients with chronic cough                                                     | McGarvey, L. P.; Carton, C.; Gamble, L. A.; Heaney, L. G.; Shepherd, R.; Ennis, M.; MacMahon, J.                                                                                                                                        | 2006 | Exclusion reason: Does not report statements that inform items or domains of cough severity; |
| Evaluation and                                                                                                      | McGarvey, L.P.; Heaney,                                                                                                                                                                                                                 | 1998 | Exclusion reason: Does not                                                                   |

|                                                                                                                |                                                                                                                                                                                                 |      |                                                                   |
|----------------------------------------------------------------------------------------------------------------|-------------------------------------------------------------------------------------------------------------------------------------------------------------------------------------------------|------|-------------------------------------------------------------------|
| outcome of patients with chronic non-productive cough using a comprehensive diagnostic protocol                | L.G.; Lawson, J.T.; Johnston, B.T.; Scally, C.M.; Ennis, M.; Shepherd, D.R.; MacMahon, J.                                                                                                       |      | report statements that inform items or domains of cough severity; |
| Prevalence of chronic cough, patient characteristics and health outcomes among UK adults                       | McGarvey, L.; Morice, A.; Way, N.; Li, V.; Weaver, J.; Doshi, I.; Urdaneta, E.; Boggs, R.                                                                                                       | 2019 | Exclusion reason: Conference abstract;                            |
| Prevalence and burden of chronic bronchitis symptoms: results from the BOLD study                              | Mejza, F.; Gnatiuc, L.; Buist, A. S.; Vollmer, W. M.; Lamprecht, B.; Obaseki, D. O.; Nastalek, P.; Nizankowska-Mogilnicka, E.; Burney, P. G. J.; collaborators, Bold; collaborators, Bold study | 2017 | Exclusion reason: Wrong indication;                               |
| Chronic Cough in America: Descriptive Analyses of Cough Characteristics and Diagnostic History                 | Meltzer, E.; Dicipinigaitis, P.; Zeiger, R.; Schatz, M.; Oppenheimer, J.; Bernstein, J.; Way, N.; Fonseca, E.; Boggs, R.; Li, V.; Schelfhout, J.                                                | 2020 | Exclusion reason: Conference abstract;                            |
| Chronic Cough in America: Prevalence and Patient Characteristics                                               | Meltzer, E.; Zeiger, R.; Schatz, M.; Dicipinigaitis, P.; Bernstein, J.; Oppenheimer, J.; Way, N.; Li, V.; Weaver, J.; Doshi, I.; Urdaneta, E.; Boggs, R.                                        | 2019 | Exclusion reason: Conference abstract;                            |
| Low prevalence of extra-thoracic airway hyper-responsiveness in UK patients with chronic refractory cough      | Menon, A.; Hull, J.; Chung, K. F.; Usmani, O.; Ward, S.                                                                                                                                         | 2015 | Exclusion reason: Conference abstract;                            |
| Frequent cough in unsatisfactory controlled asthma--results from the population-based West Sweden Asthma study | Mincheva, R.; Ekerljung, L.; Bjerg, A.; Axelsson, M.; Popov, T. A.; Lundback, B.; Lotvall, J.                                                                                                   | 2014 | Exclusion reason: Wrong indication;                               |
| Factors determining the quality of life of patients with COPD in primary care                                  | Miravittles, M.; Molina, J.; Naberan, K.; Cots, J. M.; Ros, F.; Llor, C.; study, Evoca                                                                                                          | 2007 | Exclusion reason: Wrong indication;                               |

|                                                                                                                            |                                                                                                                                                                                                          |      |                                                                                              |
|----------------------------------------------------------------------------------------------------------------------------|----------------------------------------------------------------------------------------------------------------------------------------------------------------------------------------------------------|------|----------------------------------------------------------------------------------------------|
| Clinical characteristics and outcome of acute exacerbation of chronic obstructive pulmonary disease                        | Mohammadien, H.; Ahmed, A.                                                                                                                                                                               | 2015 | Exclusion reason: Conference abstract;                                                       |
| The Manchester cough in lung cancer scale: the development and preliminary validation of a new assessment tool             | Molassiotis, A.; Ellis, J.; Wagland, R.; Williams, M. L.; Bailey, C. D.; Booton, R.; Blackhall, F.; Yorke, J.; Smith, J. A.                                                                              | 2013 | Exclusion reason: Wrong indication;                                                          |
| The experience of cough in patients diagnosed with lung cancer                                                             | Molassiotis, A.; Lowe, M.; Ellis, J.; Wagland, R.; Bailey, C.; Lloyd-Williams, M.; Tishelman, C.; Smith, J.                                                                                              | 2011 | Exclusion reason: Wrong indication;                                                          |
| The burden of cough: A retrospective observational study in the United Kingdom                                             | Morice, A. H.; Holden, S. E.; Jenkins-Jones, S.; Birring, S. S.; Langerman, H.; Weaver, J.; Currie, C.                                                                                                   | 2019 | Exclusion reason: Conference abstract;                                                       |
| Expert opinion on the cough hypersensitivity syndrome in respiratory medicine                                              | Morice, A. H.; Millqvist, E.; Belvisi, M. G.; Bieksiene, K.; Birring, S. S.; Chung, K. F.; Dal Negro, R. W.; Diczpinigaitis, P.; Kantar, A.; McGarvey, L. P.; Pacheco, A.; Sakalauskas, R.; Smith, J. A. | 2014 | Exclusion reason: Does not report statements that inform items or domains of cough severity; |
| Asthma phenotypes: do cough and wheeze predict exacerbations in persistent asthma?                                         | Morjaria, J. B.; Rigby, A. S.; Morice, A. H.                                                                                                                                                             | 2017 | Exclusion reason: Wrong indication;                                                          |
| Prs37 Characteristics of Us Adults with Self-Reported Chronic Cough: 2018 Chronic Cough Survey                             | Morlock, R.                                                                                                                                                                                              | 2019 | Exclusion reason: Conference abstract;                                                       |
| The irritable larynx syndrome                                                                                              | Morrison, M.; Rammage, L.; Emami, A. J.                                                                                                                                                                  | 1999 | Exclusion reason: Wrong indication;                                                          |
| Impact of cough and/or sputum symptoms on the burden of copd in europe and the USA: A cross-sectional, observational study | Muller, T. A.; Wiren, A.; Small, M.; Cristino, J.; Pike, J.                                                                                                                                              | 2009 | Exclusion reason: Conference abstract;                                                       |
| Impact of cough and/or sputum symptoms on                                                                                  | Muller, T. A.; Wiren, A.; Small, M.; Cristino, J.; Pike,                                                                                                                                                 | 2009 | Exclusion reason: Conference abstract;                                                       |

|                                                                                                                                             |                                                                                                                               |      |                                                                                              |
|---------------------------------------------------------------------------------------------------------------------------------------------|-------------------------------------------------------------------------------------------------------------------------------|------|----------------------------------------------------------------------------------------------|
| healthrelated quality of life in copd patients: An observational, cross-sectional study in Europe and the USA                               | J.                                                                                                                            |      |                                                                                              |
| Chronic cough, chronic phlegm and dyspnea in a large observational cohort of COPD patients                                                  | Mullerova, H.; Tal-Singer, R.; Rennard, S.; Edwards, L.; Lomas, D. A.                                                         | 2011 | Exclusion reason: Conference abstract;                                                       |
| Characteristics of patients with chronic cough who developed classic asthma during the course of cough variant asthma: a longitudinal study | Nakajima, T.; Nishimura, Y.; Nishiuma, T.; Kotani, Y.; Funada, Y.; Nakata, H.; Yokoyama, M.                                   | 2005 | Exclusion reason: Does not report statements that inform items or domains of cough severity; |
| Impaired cough-and sputum-related quality of life in patients with nontuberculous mycobacteriosis                                           | Nakayasu, H.; Shirai, T.; Suzuki, T.; Hirai, K.; Tanaka, Y.; Watanabe, H.; Saigusa, M.; Akamatsu, T.; Yamamoto, A.; Asada, K. | 2019 | Exclusion reason: Conference abstract;                                                       |
| Parent cough-specific quality of life: development and validation of a short form                                                           | Newcombe, P. A.; Sheffield, J. K.; Chang, A. B.                                                                               | 2013 | Exclusion reason: Pediatric population;                                                      |
| Co-morbid association of depression and COPD: a population-based study                                                                      | Ng, T. P.; Niti, M.; Fones, C.; Yap, K. B.; Tan, W. C.                                                                        | 2009 | Exclusion reason: Wrong indication;                                                          |
| Clinical, pathophysiologic, and microbiologic characterization of bronchiectasis in an aging cohort                                         | Nicotra, M. B.; Rivera, M.; Dale, A. M.; Shepherd, R.; Carter, R.                                                             | 1995 | Exclusion reason: Wrong indication;                                                          |
| Frequency scale for the system of gastroesophageal reflux disease in outpatients with various chronic respiratory diseases                  | Ochiai, K.; Nagaoka, M.; Kondo, M.; Tagaya, E.; Tamaoki, J.; Nagai, A.                                                        | 2009 | Exclusion reason: Conference abstract;                                                       |
| COPD prevalence and patient burden in                                                                                                       | Oh, Y. M.; Muellerova, H.; Ichinose, M.                                                                                       | 2013 | Exclusion reason: Conference abstract;                                                       |

|                                                                                                                                                                                                                 |                                                                                                                                                                                                  |      |                                                                                                       |
|-----------------------------------------------------------------------------------------------------------------------------------------------------------------------------------------------------------------|--------------------------------------------------------------------------------------------------------------------------------------------------------------------------------------------------|------|-------------------------------------------------------------------------------------------------------|
| Korea and Japan:<br>Continuing to confront<br>(C2C) COPD<br>international patient<br>survey 2012-13                                                                                                             |                                                                                                                                                                                                  |      |                                                                                                       |
| The language of<br>cough: A focus group<br>study in respiratory<br>diseases                                                                                                                                     | Oliver, S. V.; Yuill, D.;<br>Yorke, J.; Caress, A. L.;<br>Smith, J. A.                                                                                                                           | 2012 | Exclusion reason:<br>Conference abstract;                                                             |
| Chronic Cough and<br>Phlegm in Subjects<br>Undergoing<br>Comprehensive Health<br>Examination in Japan -<br>Survey of Chronic<br>Obstructive Pulmonary<br>Disease Patients<br>Epidemiology in Japan<br>(SCOPE-J) | Omori, H.; Higashi, N.;<br>Nawa, T.; Fukui, T.; Kaise,<br>T.; Suzuki, T.                                                                                                                         | 2020 | Exclusion reason: Does not<br>report statements that inform<br>items or domains of cough<br>severity; |
| Nocturnal cough and<br>arousals in CF patients<br>during periods of<br>pulmonary<br>exacerbation: Impact<br>on sleep                                                                                            | Opdekamp, C.; Jobart, S.;<br>Van Muylem, A.; Knoop, C.                                                                                                                                           | 2012 | Exclusion reason:<br>Conference abstract;                                                             |
| Chronic Cough in<br>America:<br>Characteristics of<br>Chronic Cough<br>Patients with Allergies                                                                                                                  | Oppenheimer, J.; Meltzer,<br>E.; Bernstein, J.; Schatz, M.;<br>Zeiger, R.; Dicpinigaitis, P.;<br>Way, N.; Li, V.; Fonseca,<br>E.; Boggs, R.; Schelfhout, J.                                      | 2020 | Exclusion reason:<br>Conference abstract;                                                             |
| A Cross-sectional<br>Survey of the Clinical<br>Manifestations and<br>Underlying Illness of<br>Cough                                                                                                             | Otoshi, T.; Nagano, T.;<br>Funada, Y.; Takenaka, K.;<br>Nakata, H.; Ohnishi, H.;<br>Nishiuma, T.; Nakajima, T.;<br>Kageshita, T.; Tsuchiya, T.;<br>Yamamoto, M.; Kobayashi,<br>K.; Nishimura, Y. | 2019 | Exclusion reason: Chronic<br>cough was undefined or not<br>>8 weeks;                                  |
| Shortened swallow<br>time and its<br>implication in the<br>patients with chronic<br>cough                                                                                                                       | Pan, J.; Yu, Y.; Dong, R.;<br>Zhang, M.; Xu, X.; Yu, L.;<br>Qiu, Z.                                                                                                                              | 2020 | Exclusion reason:<br>Conference abstract;                                                             |
| Patients with gastro-<br>esophageal reflux<br>disease and cough<br>have impaired                                                                                                                                | Phua, S.Y.; McGarvey, L.P.;<br>Ngu, M.C.; Ing, A.J.                                                                                                                                              | 2005 | Exclusion reason: Does not<br>report statements that inform<br>items or domains of cough<br>severity; |

|                                                                                                                                               |                                                                                                                                                                      |      |                                                                                              |
|-----------------------------------------------------------------------------------------------------------------------------------------------|----------------------------------------------------------------------------------------------------------------------------------------------------------------------|------|----------------------------------------------------------------------------------------------|
| laryngopharyngeal mechanosensitivity                                                                                                          |                                                                                                                                                                      |      |                                                                                              |
| Impact of cough across different chronic respiratory diseases: comparison of two cough-specific health-related quality of life questionnaires | Polley, L.; Yaman, N.; Heaney, L.; Cardwell, C.; Murtagh, E.; Ramsey, J.; MacMahon, J.; Costello, R. W.; McGarvey, L.                                                | 2008 | Exclusion reason: Study reports duplicate items with an included study;                      |
| An algorithmic approach to chronic cough                                                                                                      | Pratter, M.R.; Bartter, T.; Akers, S.; Dubois, J.                                                                                                                    | 1993 | Exclusion reason: Does not report statements that inform items or domains of cough severity; |
| Cough and glottic-stop reflex sensitivity in health and disease                                                                               | Prudon, B.; Birring, S. S.; Vara, D. D.; Hall, A. P.; Thompson, J. P.; Pavord, I. D.                                                                                 | 2005 | Exclusion reason: Does not report statements that inform items or domains of cough severity; |
| Determinants of asthma control and quality of life in stable asthma: evaluation of two new cough provocation tests                            | Purokivi, M.; Koskela, H.; Kontra, K.                                                                                                                                | 2013 | Exclusion reason: Wrong indication;                                                          |
| Clinical characteristics and quality of life in women with COPD: an observational study                                                       | Raherison, C.; Tillie-Leblond, I.; Prudhomme, A.; Taille, C.; Biron, E.; Nocent-Ejnaini, C.; Mathieu, B.; Ostinelli, J.                                              | 2014 | Exclusion reason: Wrong indication;                                                          |
| Reflux pattern and role of impedance-pH variables in predicting PPI response in patients with suspected GERD-related chronic cough            | Ribolsi, M.; Savarino, E.; De Bortoli, N.; Balestrieri, P.; Furnari, M.; Martinucci, I.; Casale, M.; Greco, F.; Salvinelli, F.; Savarino, V.; Marchi, S.; Cicala, M. | 2014 | Exclusion reason: Does not report statements that inform items or domains of cough severity; |
| Reflux patterns and role of impedance-ph variables in predicting ppi response in patients with suspected gerd-related chronic cough           | Ribolsi, M.; Savarino, E.; De Bortoli, N.; Balestrieri, P.; Furnari, M.; Martinucci, I.; Casale, M.; Greco, F.; Salvinelli, F.; Savarino, V.; Marchi, S.; Cicala, M. | 2014 | Exclusion reason: Conference abstract;                                                       |
| Chronic cough in patients with obstructive sleep apnea                                                                                        | Rybka, A.; Wasik, M.; Grabczak, E.; Dabrowska, M.; Bielicki, P.; Krenke, R.                                                                                          | 2018 | Exclusion reason: Conference abstract;                                                       |
| Development and                                                                                                                               | Ryden, A.; Denison, H.;                                                                                                                                              | 2013 | Exclusion reason: Wrong                                                                      |

|                                                                                                                    |                                                                                                                  |      |                                                                                              |
|--------------------------------------------------------------------------------------------------------------------|------------------------------------------------------------------------------------------------------------------|------|----------------------------------------------------------------------------------------------|
| validation of a patient-reported outcome instrument in partial responders to proton pump inhibitors                | Karlsson, M.; Vakil, N.                                                                                          |      | indication;                                                                                  |
| Cough predicts prognosis in idiopathic pulmonary fibrosis                                                          | Ryerson, C. J.; Abbritti, M.; Ley, B.; Elicker, B. M.; Jones, K. D.; Collard, H. R.                              | 2011 | Exclusion reason: Wrong indication;                                                          |
| Utility of a multidimensional upper airway visual analogue scale to characterise laryngeal dysfunction             | Selby, J.; Gillies, F.; Bailey, E.; Hull, J. H.                                                                  | 2017 | Exclusion reason: Conference abstract;                                                       |
| Utility of a throat visual analogue scale in the assessment of chronic refractory cough                            | Selby, J.; Pavitt, M.; Walsted, E.; Tidmarsh, B.; Hull, J.                                                       | 2019 | Exclusion reason: Conference abstract;                                                       |
| [An analysis of factors for quality-of-life in patients with chronic cough]. [Chinese]                             | Shi, X.; Peng, Q. F.; Kong, L. F.                                                                                | 2011 | Exclusion reason: Does not report statements that inform items or domains of cough severity; |
| Prevalence and clinical features of cough variant asthma in a general internal medicine outpatient clinic in Japan | Shirahata, K.; Fujimoto, K.; Arioka, H.; Shouda, R.; Kudo, K.; IKEDA, S.I.                                       | 2005 | Exclusion reason: Does not report statements that inform items or domains of cough severity; |
| Association of asthma control, cough related quality of life, and gastroesophageal reflux disease symptoms         | Shirai, T.; Mikamo, M.; Mori, K.; Shishido, Y.; Akita, T.; Morita, S.; Asada, K.; Fujii, M.; Suda, T.; Chida, K. | 2011 | Exclusion reason: Conference abstract;                                                       |
| Impaired cough-related quality of life in patients with controlled asthma with gastroesophageal reflux disease     | Shirai, T.; Mikamo, M.; Shishido, Y.; Akita, T.; Morita, S.; Asada, K.; Fujii, M.; Mori, K.; Suda, T.; Chida, K. | 2012 | Exclusion reason: Wrong study design;                                                        |
| Real-world effect of gastroesophageal reflux disease on cough-related quality of life and disease                  | Shirai, T.; Mikamo, M.; Tsuchiya, T.; Shishido, Y.; Akita, T.; Morita, S.; Asada, K.; Fujii, M.; Suda, T.        | 2015 | Exclusion reason: Wrong indication;                                                          |



|                                                                                                                                                                                 |                                                                                                                                                                               |      |                                                                                              |
|---------------------------------------------------------------------------------------------------------------------------------------------------------------------------------|-------------------------------------------------------------------------------------------------------------------------------------------------------------------------------|------|----------------------------------------------------------------------------------------------|
| status in asthma and COPD                                                                                                                                                       |                                                                                                                                                                               |      |                                                                                              |
| Cough-and sputum-related quality of life in nontuberculous mycobacteriosis                                                                                                      | Shirai, T.; Suzuki, T.; Tanaka, Y.; Watanabe, H.; Endo, Y.; Shimoda, Y.; Noguchi, R.; Saigusa, M.; Akamatsu, T.; Yamamoto, A.; Shishido, Y.; Akita, T.; Morita, S.; Asada, K. | 2017 | Exclusion reason: Conference abstract;                                                       |
| Chronic cough with a history of excessive sputum production: the spectrum and frequency of causes, key components of the diagnostic evaluation, and outcome of specific therapy | Smyrnios, N.A.; Irwin, R.S.; Curley, F.J.                                                                                                                                     | 1995 | Exclusion reason: Does not report statements that inform items or domains of cough severity; |
| Chronic cough, not asthma, is associated with depression in the elderly: a community-based population analysis in South Korea                                                   | Sohn, K. H.; Song, W. J.; Kim, S. H.; Jang, H. C.; Kim, K. W.; Chang, Y. S.                                                                                                   | 2019 | Exclusion reason: Does not report statements that inform items or domains of cough severity; |
| Gastroesophageal reflux and chronic unexplained cough: Preliminary results of a gismad multicenter study                                                                        | Solimando, R.; Baldi, F.; Cataudella, G.; Cicala, M.; Penagini, R.; Pugliese, D.; Ribolsi, M.                                                                                 | 2013 | Exclusion reason: Conference abstract;                                                       |
| The urge to cough in COPD                                                                                                                                                       | Solomon, A.; Cho, P. S. P.; Fletcher, H.; Patel, I. S.; Jolley, C. J.; Turner, R. D.; Birring, S. S.                                                                          | 2017 | Exclusion reason: Conference abstract;                                                       |
| Objective cough frequency monitoring in bronchiectasis                                                                                                                          | Spinou, A.; Garrod, R.; Lee, K. K.; Elston, C.; Loebinger, M. R.; Chung, K. F.; Wilson, R.; Birring, S. S.                                                                    | 2014 | Exclusion reason: Conference abstract;                                                       |
| The development and validation of the Bronchiectasis Health Questionnaire                                                                                                       | Spinou, A.; Siegert, R. J.; Guan, W. J.; Patel, A. S.; Gosker, H. R.; Lee, K. K.; Elston, C.; Loebinger, M. R.; Wilson, R.; Garrod, R.; Birring, S. S.                        | 2017 | Exclusion reason: Wrong indication;                                                          |
| Is laryngeal                                                                                                                                                                    | Stark, A.; Wright, M.;                                                                                                                                                        | 2020 | Exclusion reason:                                                                            |

|                                                                                                                                                                                                               |                                                                                                                                                             |      |                                                                                              |
|---------------------------------------------------------------------------------------------------------------------------------------------------------------------------------------------------------------|-------------------------------------------------------------------------------------------------------------------------------------------------------------|------|----------------------------------------------------------------------------------------------|
| hypersensitivity the basis for cough hypersensitivity in chronic cough?                                                                                                                                       | Sundar, K.                                                                                                                                                  |      | Conference abstract;                                                                         |
| Frequency and self-management of pain, dyspnea, and cough in cystic fibrosis                                                                                                                                  | Stenekes, S. J.; Hughes, A.; Gregoire, M. C.; Frager, G.; Robinson, W. M.; McGrath, P. J.                                                                   | 2009 | Exclusion reason: Wrong indication;                                                          |
| Pain, dyspnea and cough: a survey of Maritime Canadians living with cystic fibrosis                                                                                                                           | Stenekes, S.; GrÃ©goire, M.; Frager, G.; Hughes, A.                                                                                                         | 2006 | Exclusion reason: Wrong indication;                                                          |
| Impact and factors associated with nighttime and early morning symptoms among patients with chronic obstructive pulmonary disease                                                                             | Stephenson, J. J.; Cai, Q.; Mocarski, M.; Tan, H.; Doshi, J. A.; Sullivan, S. D.                                                                            | 2015 | Exclusion reason: Wrong indication;                                                          |
| Clinical profile of chronic cough patients improving with therapy for sleep apnoea                                                                                                                            | Sundar, K. M.; Daly, S. E.                                                                                                                                  | 2011 | Exclusion reason: Conference abstract;                                                       |
| Chronic cough and obstructive sleep apnea in a community-based pulmonary practice                                                                                                                             | Sundar, K. M.; Daly, S. E.; Pearce, M. J.; Alward, W. T.                                                                                                    | 2010 | Exclusion reason: Does not report statements that inform items or domains of cough severity; |
| Prospective study of the prevalence of obstructive sleep apnea (OSA) in patients with chronic cough and impact of nocturnal continuous positive airway pressure therapy (CPAP) on the course of chronic cough | Sundar, K.; Daly, S.; Willis, A.                                                                                                                            | 2012 | Exclusion reason: Conference abstract;                                                       |
| Characteristics of COPD in non-smokers-results from the canadian obstructive lung disease [COLD] study                                                                                                        | Tan, W. C.; Chuang, J.; Bourbeau, J.; Fitzgerald, M. J.; Cowie, R.; Hernandez, P.; Chapman, K.; Aaron, S. D.; O'Donnell, D. E.; Marciniuk, D.; Maltais, F.; | 2012 | Exclusion reason: Conference abstract;                                                       |

|                                                                                                                                                       |                                                                                                                                                                                                                     |      |                                                                                              |
|-------------------------------------------------------------------------------------------------------------------------------------------------------|---------------------------------------------------------------------------------------------------------------------------------------------------------------------------------------------------------------------|------|----------------------------------------------------------------------------------------------|
|                                                                                                                                                       | Goldstein, R.; Sin, D.                                                                                                                                                                                              |      |                                                                                              |
| Workplace-related chronic cough on a mushroom farm                                                                                                    | Tanaka, H.; Saikai, T.; Sugawara, H.; Takeya, I.; Tsunematsu, K.; Matsuura, A.; Abe, S.; Tanaka, Hiroshi; Saikai, Toyohiro; Sugawara, Hiroyuki; Takeya, Isao; Tsunematsu, Kazunori; Matsuura, Akihiro; Abe, Shosaku | 2002 | Exclusion reason: Does not report statements that inform items or domains of cough severity; |
| Identifying asthma and chronic obstructive pulmonary disease in patients with persistent cough presenting to general practitioners: descriptive study | Thiadens, H. A.; de Bock, G. H.; Dekker, F. W.; Huysman, J. A. N.; van Houwelingen, J. C.; Springer, M. P.; Postma, D. S.                                                                                           | 1998 | Exclusion reason: Wrong indication;                                                          |
| Chronic cough and sputum production are associated with worse clinical outcomes in stable asthma                                                      | Thomson, N. C.; Chaudhuri, R.; Messow, C. M.; Spears, M.; MacNee, W.; Connell, M.; Murchison, J. T.; Sproule, M.; McSharry, C.                                                                                      | 2013 | Exclusion reason: Wrong indication;                                                          |
| Description of the urge-to-cough in chronic cough                                                                                                     | Thurston, A. T.; Young, E.; Marsden, P.; Decalmer, S.; Woodcock, A.; Smith, J. A.                                                                                                                                   | 2009 | Exclusion reason: Conference abstract;                                                       |
| Challenges of chronic cough caused by gastroesophageal reflux disease in clinical management                                                          | Todea, D.; Rosca, L. E.; Coman, A. C.                                                                                                                                                                               | 2014 | Exclusion reason: Conference abstract;                                                       |
| Atypical symptoms and health-related quality of life of patients with asymptomatic reflux esophagitis                                                 | Tomita, T.; Yasuda, T.; Oka, H.; Terao, S.; Arai, E.; Oshima, T.; Fukui, H.; Hori, K.; Watari, J.; Miwa, H.                                                                                                         | 2015 | Exclusion reason: Wrong indication;                                                          |
| Repercussion of cough in sleep quality in COPD exacerbation                                                                                           | Torres-Sanchez, I.; Ruiz-Saez, A.; Casado-Moreno, I.; Gallego-Ariza, B.; Cabrera-Martos, I.; Valenza, M. C.                                                                                                         | 2014 | Exclusion reason: Conference abstract;                                                       |
| Cough and sputum production in severe asthma: A specific disease phenotype?                                                                           | Tummino, C.; Alagha, K.; Gras, D.; Bourdin, A.; Varrin, M.; Molinari, N.; Vachier, I.; Chanez, P.                                                                                                                   | 2010 | Exclusion reason: Conference abstract;                                                       |
| Cough frequency and                                                                                                                                   | Turner, R. D.; Birring, S. S.;                                                                                                                                                                                      | 2013 | Exclusion reason:                                                                            |

|                                                                                                 |                                                                                                                                                                                       |      |                                                                                              |
|-------------------------------------------------------------------------------------------------|---------------------------------------------------------------------------------------------------------------------------------------------------------------------------------------|------|----------------------------------------------------------------------------------------------|
| morbidity in inpatients with acute respiratory disease                                          | Matos, S.; Bothamley, G. H.                                                                                                                                                           |      | Conference abstract;                                                                         |
| Laryngeal hypersensitivity in chronic refractory cough and paradoxical vocal fold movement      | Vertigan, A. E.; Gibson, P. G.; Bone, S. L.                                                                                                                                           | 2014 | Exclusion reason: Conference abstract;                                                       |
| Chronic cough in Vocal Cord Dysfunction: Description of a clinical entity                       | Vertigan, A. E.; Kapela, S. L.; Gibson, P. G.                                                                                                                                         | 2020 | Exclusion reason: Does not report statements that inform items or domains of cough severity; |
| Laryngeal Dysfunction in Cough Hypersensitivity Syndrome: A Cross-Sectional Observational Study | Vertigan, A. E.; Kapela, S. M.; Kearney, E. K.; Gibson, P. G.                                                                                                                         | 2018 | Exclusion reason: Does not report statements that inform items or domains of cough severity; |
| Chronic cough and OSA in patients undergoing polysomnography: A cross sectional study           | Vinay, A.; Galloway, K.; Stewart, C.; Sundararajan, V.; Kyoong, A.                                                                                                                    | 2014 | Exclusion reason: Conference abstract;                                                       |
| Quality of life in patients with bronchiectasis treated at a dedicated bronchiectasis center    | Vyas, A.; Quittner, A. L.; Vyas, D.; Waterer, G. W.; Metersky, M. L.                                                                                                                  | 2012 | Exclusion reason: Conference abstract;                                                       |
| Chronic cough and obstructive sleep apnoea in a sleep laboratory-based pulmonary practice       | Wang, T. Y.; Lo, Y. L.; Liu, W. T.; Lin, S. M.; Lin, T. Y.; Kuo, C. H.; Chung, F. T.; Chou, P. C.; Chang, P. J.; Ni, Y. L.; Ho, S. C.; Lin, H. C.; Wang, C. H.; Yu, C. T.; Kuo, H. P. | 2013 | Exclusion reason: Does not report statements that inform items or domains of cough severity; |
| Comparison of cause distribution between elderly and non-elderly patients with chronic cough    | Wei, W.; Yu, L.; Lü, H.; Wang, L.; Shi, C.; Ma, W.; Huang, Y.; Qiu, Z.                                                                                                                | 2009 | Exclusion reason: Does not report statements that inform items or domains of cough severity; |
| Development and validation of the Salzburg COPD-screening questionnaire (SCSQ):                 | Weiss, G.; Steinacher, I.; Lamprecht, B.; Kaiser, B.; Mikes, R.; Sator, L.; Hartl, S.; Wagner, H.; Studnicka, M.                                                                      | 2017 | Exclusion reason: Wrong indication;                                                          |

|                                                                                                                                     |                                                                                                                                                             |      |                                                                                              |
|-------------------------------------------------------------------------------------------------------------------------------------|-------------------------------------------------------------------------------------------------------------------------------------------------------------|------|----------------------------------------------------------------------------------------------|
| a questionnaire development and validation study                                                                                    |                                                                                                                                                             |      |                                                                                              |
| Determinants of different dimensions of disease severity in asthma and COPD : pulmonary function and health-related quality of life | Wijnhoven, H. A. H.; Kriegsman, D. M. W.; Hesselink, A. E.; Penninx, B. W. J.; De Haan, M.; Wijnhoven, H. A.; Kriegsman, D. M.; Penninx, B. W.; de Haan, M. | 2001 | Exclusion reason: Does not report statements that inform items or domains of cough severity; |
| Long-term outcomes following behavioral management of chronic refractory cough                                                      | Wright, M. L.; Sundar, K. M.; Herrick, J. S.; Barkmeier-Kraemer, J.                                                                                         | 2020 | Exclusion reason: Conference abstract;                                                       |
| Symptom Clusters and Health-related Quality of Life in Chinese patients with Chronic Obstructive Pulmonary Disease                  | Wu, Maochun; Zan, Tao; Zhao, Qiheng; Ge, Song; Li, Kun; Li, Junxin                                                                                          | 2020 | Exclusion reason: Wrong indication;                                                          |
| Clinical features of chronic cough due to non-acid gastro-esophageal reflux                                                         | Xu, X. H.; Wang, L.; Liu, B.; Yu, L.; Qiu, Z. H.; Lu, H. J.; Qiu, Z. M.                                                                                     | 2011 | Exclusion reason: Conference abstract;                                                       |
| Cinical characteristics and indication of anti-reflux therapy effectiveness for gastro-esophageal reflux-related cough              | Ye, Y.; Lai, K.; Chen, R.; Chen, Q.; Liu, C.; Yan, H.; Luo, J.; Wu, Y.; Zhong, N.                                                                           | 2011 | Exclusion reason: Conference abstract;                                                       |
| Severe sleep apnea syndrome associated with chronic cough without daytime sleepiness                                                | Yokohori, N.; Hasegawa, M.; Sato, A.; Katsura, H.                                                                                                           | 2015 | Exclusion reason: Conference abstract;                                                       |
| The long-term outcome of patients with unexplained chronic cough                                                                    | Yousaf, N.; Birring, S. S.; Pavord, I. D.                                                                                                                   | 2009 | Exclusion reason: Conference abstract;                                                       |
| The long term outcome of patients with unexplained chronic cough                                                                    | Yousaf, N.; Montinero, W.; Birring, S. S.; Pavord, I. D.                                                                                                    | 2013 | Exclusion reason: Does not report statements that inform items or domains of cough severity; |
| Reflux characteristics in patients with                                                                                             | Yu, Y.; Wen, S.; Wang, S.; Shi, C.; Ding, H.; Qiu, Z.;                                                                                                      | 2019 | Exclusion reason: Does not report statements that inform                                     |

|                                                                                                                                |                                                                                                                                         |      |                                        |
|--------------------------------------------------------------------------------------------------------------------------------|-----------------------------------------------------------------------------------------------------------------------------------------|------|----------------------------------------|
| gastroesophageal reflux-related chronic cough complicated by laryngopharyngeal reflux                                          | Xu, X.; Yu, L.                                                                                                                          |      | items or domains of cough severity;    |
| Reflux characteristics in patients with GERD complicated by laryngopharyngeal reflux                                           | Yu, Y.; Wen, S.; Wang, S.; Shi, C.; Ding, H.; Qiu, Z.; Xu, X.; Yu, L.                                                                   | 2020 | Exclusion reason: Conference abstract; |
| Characteristics and burden of chronic cough in adults in a large managed care organization                                     | Zeiger, R. S.; Schatz, M.; Butler, R. K.; Weaver, J. P.; Chen, W.                                                                       | 2019 | Exclusion reason: Conference abstract; |
| Identification and burden of chronic cough in adults in a large managed care organization                                      | Zeiger, R. S.; Schatz, M.; Xie, F.; Hong, B. D.; Weaver, J. P.; Schelfhout, J.; Chen, W.                                                | 2020 | Exclusion reason: Conference abstract; |
| Chronic Cough in Adults in a Large Managed Care Organization                                                                   | Zeiger, R.; Schatz, M.; Butler, R.; Weaver, J.; Chen, W.                                                                                | 2019 | Exclusion reason: Conference abstract; |
| [Construction and analysis of questionnaires on AIDS cough in traditional Chinese medicine diagnosis and treatment procedures] | Zhang, Y.; Xue, L. H.; Chen, Y. X.; Huang, S. J.; Pan, J. H.; Wang, J.                                                                  | 2013 | Exclusion reason: Wrong indication;    |
| Comparison of clinical characteristics and pathophysiology of cough predominate asthma and noncough predominate asthma         | Zhou, J.; Pan, J. Y.; Luo, W.; Chen, Q.; Lai, K. F.                                                                                     | 2016 | Exclusion reason: Conference abstract; |
| The clinical and pathophysiological features of cough-predominant-asthma                                                       | Zhou, J.; Yi, F.; Li, H.; Luo, W.; Chen, Q.; Lai, K.                                                                                    | 2018 | Exclusion reason: Conference abstract; |
| Development and validation of a chronic obstructive pulmonary disease screening questionnaire in China                         | Zhou, Y. M.; Chen, S. Y.; Tian, J.; Cui, J. Y.; Li, X. C.; Hong, W.; Zhao, Z. X.; Hu, G. P.; He, F.; Qiu, R.; Wang, X. P.; Wang, D. L.; | 2013 | Exclusion reason: Wrong indication;    |

|                                                                                                    |                                                                                             |      |                                           |
|----------------------------------------------------------------------------------------------------|---------------------------------------------------------------------------------------------|------|-------------------------------------------|
|                                                                                                    | Zheng, J. P.; Zhong, N. S.;<br>Ran, P. X.                                                   |      |                                           |
| Assessment of the prevalence of obstructive sleep apnea in patients with undiagnosed chronic cough | Zidan, M.; Shaarawy, H.                                                                     | 2012 | Exclusion reason:<br>Conference abstract; |
| Do patients with stress incontinence cough or do cough patients suffer from urinary incontinence?  | Zoglmann, R.; Nguyen, T.;<br>Engberts, M.; Vaessen, D.;<br>Patberg, N.; Van Den Berg,<br>J. | 2015 | Exclusion reason:<br>Conference abstract; |
| [Acute dry coughs have underestimated impacts on patients' everyday lives]                         | Zuck, P.; Allaert, F. A.                                                                    | 2011 | Exclusion reason: Wrong indication;       |

**Supplementary Table 3:** Characteristics of cough-specific PROMs included in the review

| <b>Patient reported outcome measurement</b>                  | <b>Target conditions</b>                                                            | <b>Construct(s) assessed</b>                              | <b>Number of items</b> | <b>Number of domains</b> | <b>Domains/items assessed</b>                                                             | <b>Recall period</b> | <b>Score range</b> |
|--------------------------------------------------------------|-------------------------------------------------------------------------------------|-----------------------------------------------------------|------------------------|--------------------------|-------------------------------------------------------------------------------------------|----------------------|--------------------|
| <b>Chronic Cough Impact Questionnaire (CCIQ)(1)</b>          | Chronic cough                                                                       | Cough impact on QoL                                       | 21                     | 4                        | Impact on daily life<br>Impact on relationships<br>Impact on mood<br>Impact on sleep      | 2 weeks              | 21-105             |
| <b>Cough and Sputum Assessment Questionnaire (CASA-Q)(2)</b> | Cough in patients with chronic obstructive pulmonary disease and chronic bronchitis | Frequency and severity of cough and sputum, impact on QoL | 20                     | 4                        | Cough symptom<br>Cough impact<br>Sputum symptom<br>Sputum impact                          | 1 week               | 0-100              |
| <b>Cough Assessment Test (COAT)(3)</b>                       | Chronic cough                                                                       | Cough impact on QoL                                       | 5                      | 0                        | Frequency<br>Impact on daily life<br>Impact on sleep<br>Fatigue<br>Cough hypersensitivity | 3 days               | 0-20               |
| <b>Cough Evaluation Test</b>                                 | Chronic cough                                                                       | Cough severity, cough impact                              | 5                      | 0                        | Frequency                                                                                 | Not specified        | 5-25               |



|                                                 |                                           |                                     |    |   |                                                                                                                                                    |               |        |
|-------------------------------------------------|-------------------------------------------|-------------------------------------|----|---|----------------------------------------------------------------------------------------------------------------------------------------------------|---------------|--------|
| <b>(CET)(4)</b>                                 |                                           | on QoL                              |    |   | Intensity<br>Impact on sleep<br>Impact on daily life<br>Impact on psychological health                                                             |               |        |
| <b>Cough Severity Diary (CSD)(5)</b>            | Chronic and subacute cough                | Cough severity, cough impact on QoL | 7  | 3 | Frequency<br>Intensity<br>Disruption                                                                                                               | 1 day         | 0-10   |
| <b>Cough Severity Index (CSI)(6)</b>            | Chronic cough related to the upper airway | Cough severity, cough impact on QoL | 10 | 0 | Cough hypersensitivity<br>Impact on daily life<br>Impact on social life<br>Impact on mood                                                          | 1 month       | 0-40   |
| <b>Cough Specific Quality of Life (CQLQ)(7)</b> | Chronic and acute cough                   | Cough impact on QoL                 | 28 | 6 | Physical complaints<br>Psychosocial issues<br>Functional abilities<br>Emotional well-being<br>Extreme physical complaints<br>Personal safety fears | Not specified | 28-112 |
| <b>Cough Symptom Score</b>                      | Chronic cough                             | Cough severity, cough impact        | 2  | 0 | Frequency<br>Intensity                                                                                                                             | Not specified | 0-5    |

|                                                                     |                                 |                                     |    |   |                                               |               |                                   |
|---------------------------------------------------------------------|---------------------------------|-------------------------------------|----|---|-----------------------------------------------|---------------|-----------------------------------|
| <b>(CSS)(8)</b>                                                     |                                 | on QoL                              |    |   | Impact on daily activities<br>Impact on sleep |               |                                   |
| <b>Hull Airway Reflux Questionnaire (HARQ)(9)</b>                   | Chronic cough                   | Cough hypersensitivity              | 14 | 0 | Cough hypersensitivity<br>Cough symptom       | 1 month       | 0-70                              |
| <b>Leicester Cough Questionnaire (LCQ)(10)</b>                      | Chronic cough                   | Cough impact on QoL                 | 19 | 3 | Physical<br>Psychological<br>Social           | 2 weeks       | 3-21                              |
| <b>Newcastle Laryngeal Hypersensitivity Questionnaire (LHQ)(11)</b> | Laryngeal dysfunction syndromes | Laryngeal sensory disturbance       | 14 | 3 | Obstruction<br>Pain/thermal<br>Irritation     | Not specified | score $\leq 17$ taken as abnormal |
| <b>Punum Ladder(12)</b>                                             | Chronic cough                   | Cough severity, cough impact on QoL | 2  | 0 | Cough severity<br>Overall quality of life     | 1 week        | 0-10 (two subscales)              |

1. Baiardini I, Braido F, Fassio O, Tarantini F, Pasquali M, Tarchino F, et al. A new tool to assess and monitor the burden of chronic cough on quality of life: Chronic Cough Impact Questionnaire. *Allergy*. 2005;60(4):482-8.

2. Crawford B, Monz B, Hohlfeld J, Roche N, Rubin B, Magnussen H, et al. Development and validation of a cough and sputum assessment questionnaire. *Respir Med.* 2008;102(11):1545-55.
3. Koo HK, Jeong I, Kim JH, Kim SK, Shin JW, Park SY, et al. Development and validation of the COugh Assessment Test (COAT). *Respirology.* 2019;24(6):551-7.
4. Zhan W, Zhang L, Jiang M, Chen M, Yuan X, Sun J, et al. A new simple score of chronic cough: cough evaluation test. *BMC pulm.* 2020;20(1):68.
5. Vernon M, Kline Leidy N, Nacson A, Nelsen L. Measuring cough severity: development and pilot testing of a new seven-item cough severity patient-reported outcome measure. *Therapeutic advances in respiratory disease.* 2010;4(4):199-208.
6. Shembel AC, Rosen CA, Zullo TG, Gartner-Schmidt JL. Development and validation of the cough severity index: a severity index for chronic cough related to the upper airway. *Laryngoscope.* 2013;123(8):1931-6.
7. French CT, Irwin RS, Fletcher KE, Adams TM. Evaluation of a cough-specific quality-of-life questionnaire. *Chest.* 2002;121(4):1123-31.
8. Hsu J, Stone R, Logan-Sinclair R, Worsdell M, Busst C, Chung K. Coughing frequency in patients with persistent cough: assessment using a 24 hour ambulatory recorder. *European Respiratory Journal.* 1994;7(7):1246-53.
9. Morice AH, Faruqi S, Wright CE, Thompson R, Bland JM. Cough hypersensitivity syndrome: a distinct clinical entity. *Lung.* 2011;189(1):73-9.

10. Birring SS, Prudon B, Carr AJ, Singh SJ, Morgan MD, Pavord ID. Development of a symptom specific health status measure for patients with chronic cough: Leicester Cough Questionnaire (LCQ). *Thorax*. 2003;58(4):339-43.
11. Vertigan AE, Bone SL, Gibson PG. Development and validation of the Newcastle laryngeal hypersensitivity questionnaire. *Cough* (London, England). 2014;10(1):1.
12. Fletcher KE, French CT, Irwin RS, Corapi KM, Norman GR. A prospective global measure, the Punum Ladder, provides more valid assessments of quality of life than a retrospective transition measure. *Journal of Clinical Epidemiology*. 2010;63(10):1123-31.
